# Supplementary material for: Geographically weighted temporally correlated logistic regression model
Source: PubMed Central journal article supplement (PMC5780421; doi:10.1038/s41598-018-19772-6), 2018-01-23

## **Supplementary Codes to**

### **Geographically weighted temporally correlated logistic regression model**

#### **Authors:**

Yang Liu<sup>1,2</sup>, Kwok-Fai Lam<sup>3</sup>, Joseph T Wu<sup>2</sup>, Tommy Tsan-Yuk Lam<sup>1,2\*</sup>

#### **Affiliations:**

<sup>1</sup> Center of Influenza Research, State Key Laboratory of Emerging Infectious Diseases, The University of Hong Kong

<sup>2</sup> School of Public Health, The University of Hong Kong

<sup>3</sup> Department of Statistics and Actuarial Science, The University of Hong Kong

\* Corresponding author

Email: [ttylam@hku.hk](mailto:ttylam@hku.hk)

Postal address: 5/F, Laboratory Block, Li Ka Shing Faculty of Medicine, The University of Hong Kong, 21 Sassoon Road, Pokfulam, Hong Kong SAR, China.

**Please first run the following basic code**

```
prob[x_, beta_] := Exp[x.beta]/(1 + Exp[x.beta]);

(*rou[t1_,t2_,d_] := Exp[-Abs[t1-t2]*Exp[d]];*)
rou[t1_, t2_, d_] := d^(Abs[t1 - t2]);

TNear[t_, tao_, DATA_] := Pick[DATA, Table[Abs[DATA[[i]][[5]] - t] ≤ tao, {i, 1, Length[DATA]}]];

GeoW[x_, y_, band_] := N[Exp[-(QuantityMagnitude[GeoDistance[x, y][[3 ;; 4]]]^2)/(band^2)]];
(*GeoW[x_, y_, band_] := N[If[EuclideanDistance[x, y][[3 ;; 4]] < band, (1 - SquaredEuclideanDistance[x[[3 ;; 4], y[[3 ;; 4]]]/(band^2))^2, 0]];*)

Ker[x_] := (1/Sqrt[2 * Pi]) * Exp[-(x^2)/2];

op11[x_, beta_] := CDF[BinormalDistribution[0,
  {Quantile[NormalDistribution[0, 1], prob[x[[6 ;; Length[x]]], beta]], Quantile[NormalDistribution[0, 1], prob[x[[6 ;; Length[x]]], beta]}]];
op10[x_, beta_] := CDF[BinormalDistribution[0, {Quantile[NormalDistribution[0, 1], prob[x[[6 ;; Length[x]]], beta]],
  -Quantile[NormalDistribution[0, 1], prob[x[[6 ;; Length[x]]], beta]}]];
op00[x_, beta_] := CDF[BinormalDistribution[0, {-Quantile[NormalDistribution[0, 1], prob[x[[6 ;; Length[x]]], beta]],
  -Quantile[NormalDistribution[0, 1], prob[x[[6 ;; Length[x]]], beta]}]];

p11[x_, y_, beta_, d_] := CDF[BinormalDistribution[rou[x[[5]], y[[5]], d],
  {Quantile[NormalDistribution[0, 1], prob[x[[6 ;; Length[x]]], beta]], Quantile[NormalDistribution[0, 1], prob[y[[6 ;; Length[x]]], beta]}]];
p10[x_, y_, beta_, d_] := CDF[NormalDistribution[0, 1, Quantile[NormalDistribution[0, 1], prob[x[[6 ;; Length[x]]], beta]] - p11[x, y, beta, d]];
p01[x_, y_, beta_, d_] := CDF[NormalDistribution[0, 1, Quantile[NormalDistribution[0, 1], prob[y[[6 ;; Length[x]]], beta]] - p11[x, y, beta, d]];
p00[x_, y_, beta_, d_] := 1 - p11[x, y, beta, d] - p10[x, y, beta, d] - p01[x, y, beta, d];

odp11[x_, beta_] := CDF[NormalDistribution[0, 1, Quantile[NormalDistribution[0, 1], prob[x[[6 ;; Length[x]]], beta]]] *
  (Exp[x[[6 ;; Length[x]]].beta]/(1 + Exp[x[[6 ;; Length[x]]].beta])^2) * x[[6 ;; Length[x]]] +
  CDF[NormalDistribution[0, 1, Quantile[NormalDistribution[0, 1], prob[x[[6 ;; Length[x]]], beta]]] *
  (Exp[x[[6 ;; Length[x]]].beta]/(1 + Exp[x[[6 ;; Length[x]]].beta])^2) * x[[6 ;; Length[x]]];
odp10[x_, beta_] := CDF[NormalDistribution[0, 1, -Quantile[NormalDistribution[0, 1], prob[x[[6 ;; Length[x]]], beta]]] *
  (Exp[x[[6 ;; Length[x]]].beta]/(1 + Exp[x[[6 ;; Length[x]]].beta])^2) * x[[6 ;; Length[x]]] -
  CDF[NormalDistribution[0, 1, Quantile[NormalDistribution[0, 1], prob[x[[6 ;; Length[x]]], beta]]] *
  (Exp[x[[6 ;; Length[x]]].beta]/(1 + Exp[x[[6 ;; Length[x]]].beta])^2) * x[[6 ;; Length[x]]];
odp00[x_, beta_] := -CDF[NormalDistribution[0, 1, -Quantile[NormalDistribution[0, 1], prob[x[[6 ;; Length[x]]], beta]]] *
  (Exp[x[[6 ;; Length[x]]].beta]/(1 + Exp[x[[6 ;; Length[x]]].beta])^2) * x[[6 ;; Length[x]]] -
  CDF[NormalDistribution[0, 1, -Quantile[NormalDistribution[0, 1], prob[x[[6 ;; Length[x]]], beta]]] *
  (Exp[x[[6 ;; Length[x]]].beta]/(1 + Exp[x[[6 ;; Length[x]]].beta])^2) * x[[6 ;; Length[x]]];
```

```

dp11[x_, y_, beta_, d_] :=
  CDF[NormalDistribution[0, 1], (Quantile[NormalDistribution[0, 1], prob[y[[6 ;; Length[x]]], beta]] - Quantile[NormalDistribution[0, 1],
    prob[x[[6 ;; Length[x]]], beta]] * rou[x[[5]], y[[5]], d]) / (Sqrt[1 - (rou[x[[5]], y[[5]], d)]^2])] *
  (Exp[x[[6 ;; Length[x]]].beta] / (1 + Exp[x[[6 ;; Length[x]]].beta])^2) * x[[6 ;; Length[x]]] +
  CDF[NormalDistribution[0, 1], (Quantile[NormalDistribution[0, 1], prob[x[[6 ;; Length[x]]], beta]] -
    Quantile[NormalDistribution[0, 1], prob[y[[6 ;; Length[x]]], beta]] * rou[x[[5]], y[[5]], d]) /
  (Sqrt[1 - (rou[x[[5]], y[[5]], d)]^2])] * (Exp[y[[6 ;; Length[x]]].beta] / (1 + Exp[y[[6 ;; Length[x]]].beta])^2) * y[[6 ;; Length[x]]];
dp10[x_, y_, beta_, d_] := CDF[NormalDistribution[0, 1], (-Quantile[NormalDistribution[0, 1], prob[y[[6 ;; Length[x]]], beta]] +
  Quantile[NormalDistribution[0, 1], prob[x[[6 ;; Length[x]]], beta]] * rou[x[[5]], y[[5]], d]) /
  (Sqrt[1 - (rou[x[[5]], y[[5]], d)]^2])] * (Exp[x[[6 ;; Length[x]]].beta] / (1 + Exp[x[[6 ;; Length[x]]].beta])^2) * x[[6 ;; Length[x]]] -
  CDF[NormalDistribution[0, 1], (Quantile[NormalDistribution[0, 1], prob[x[[6 ;; Length[x]]], beta]] -
    Quantile[NormalDistribution[0, 1], prob[y[[6 ;; Length[x]]], beta]] * rou[x[[5]], y[[5]], d]) /
  (Sqrt[1 - (rou[x[[5]], y[[5]], d)]^2])] * (Exp[y[[6 ;; Length[x]]].beta] / (1 + Exp[y[[6 ;; Length[x]]].beta])^2) * y[[6 ;; Length[x]]];
dp01[x_, y_, beta_, d_] := -CDF[NormalDistribution[0, 1], (Quantile[NormalDistribution[0, 1], prob[y[[6 ;; Length[x]]], beta]] -
  Quantile[NormalDistribution[0, 1], prob[x[[6 ;; Length[x]]], beta]] * rou[x[[5]], y[[5]], d]) /
  (Sqrt[1 - (rou[x[[5]], y[[5]], d)]^2])] * (Exp[x[[6 ;; Length[x]]].beta] / (1 + Exp[x[[6 ;; Length[x]]].beta])^2) * x[[6 ;; Length[x]]] +
  CDF[NormalDistribution[0, 1], (-Quantile[NormalDistribution[0, 1], prob[x[[6 ;; Length[x]]], beta]] +
    Quantile[NormalDistribution[0, 1], prob[y[[6 ;; Length[x]]], beta]] * rou[x[[5]], y[[5]], d]) /
  (Sqrt[1 - (rou[x[[5]], y[[5]], d)]^2])] * (Exp[y[[6 ;; Length[x]]].beta] / (1 + Exp[y[[6 ;; Length[x]]].beta])^2) * y[[6 ;; Length[x]]];
dp00[x_, y_, beta_, d_] := -CDF[NormalDistribution[0, 1], (-Quantile[NormalDistribution[0, 1], prob[y[[6 ;; Length[x]]], beta]] +
  Quantile[NormalDistribution[0, 1], prob[x[[6 ;; Length[x]]], beta]] * rou[x[[5]], y[[5]], d]) /
  (Sqrt[1 - (rou[x[[5]], y[[5]], d)]^2])] * (Exp[x[[6 ;; Length[x]]].beta] / (1 + Exp[x[[6 ;; Length[x]]].beta])^2) * x[[6 ;; Length[x]]] -
  CDF[NormalDistribution[0, 1], (-Quantile[NormalDistribution[0, 1], prob[x[[6 ;; Length[x]]], beta]] +
    Quantile[NormalDistribution[0, 1], prob[y[[6 ;; Length[x]]], beta]] * rou[x[[5]], y[[5]], d]) /
  (Sqrt[1 - (rou[x[[5]], y[[5]], d)]^2])] * (Exp[y[[6 ;; Length[x]]].beta] / (1 + Exp[y[[6 ;; Length[x]]].beta])^2) * y[[6 ;; Length[x]]];

I1[x_, beta_] := Binomial[x[[1]], 2] * (1 / op11[x, beta]) * odp11[x, beta] +
  x[[1]] * (x[[2]] - x[[1]]) * (1 / op10[x, beta]) * odp10[x, beta] + Binomial[x[[2]] - x[[1]], 2] * (1 / op00[x, beta]) * odp00[x, beta];

O1[x_, y_, beta_, d_] := x[[1]] * y[[1]] * (1 / p11[x, y, beta, d]) * dp11[x, y, beta, d] +
  x[[1]] * (y[[2]] - y[[1]]) * (1 / p10[x, y, beta, d]) * dp10[x, y, beta, d] + y[[1]] * (x[[2]] - x[[1]]) * (1 / p01[x, y, beta, d]) * dp01[x, y, beta, d] +
  (x[[2]] - x[[1]]) * (y[[2]] - y[[1]]) * (1 / p00[x, y, beta, d]) * dp00[x, y, beta, d];

Od2p[x_, y_, beta_, d_] := -x[[2]] * y[[2]] * ((Outer[Times, dp11[x, y, beta, d], dp11[x, y, beta, d]] * (1 / p11[x, y, beta, d])) +
  (Outer[Times, dp10[x, y, beta, d], dp10[x, y, beta, d]] * (1 / p10[x, y, beta, d])) +
  (Outer[Times, dp01[x, y, beta, d], dp01[x, y, beta, d]] * (1 / p01[x, y, beta, d])) +
  (Outer[Times, dp00[x, y, beta, d], dp00[x, y, beta, d]] * (1 / p00[x, y, beta, d]));

Id2p[x_, beta_] := -Binomial[x[[2]], 2] *
  (Outer[Times, odp11[x, beta], odp11[x, beta]] * (1 / op11[x, beta]) + 2 * Outer[Times, odp10[x, beta], odp10[x, beta]] * (1 / op10[x, beta]) +
  Outer[Times, odp00[x, beta], odp00[x, beta]] * (1 / op00[x, beta]));

```

```

GTDE1[beta_, d_, DATA_] := (DR = 0;
  Do[DR += I1[DATA[[i]], beta], {i, 1, Length[DATA]}];
  Do[DR += O1[DATA[[i]], DATA[[j]], beta, d], {i, 1, Length[DATA] - 1}, {j, i + 1, Length[DATA]}]; DR);

DE1[a_, b_, band_, beta_, d_, DATA_] := (D1R = 0;
  D1Set = Split[DATA, #1[[3 ;; 4]] == #2[[3 ;; 4]] &];
  Do[
    D1R += GeoW[{a, b}, D1Set[[i]][[1]], band] * (1 / (Total[D1Set[[i]][[All, 2]]] - 1)) * GTDE1[beta, d, D1Set[[i]], {i, 1, Length[D1Set]}];
  D1R);

GTDE2[beta_, d_, DATA_] := (FSI = 0;
  Do[FSI += Id2p[DATA[[i]], beta], {i, 1, Length[DATA]}];
  Do[FSI += Od2p[DATA[[i]], DATA[[j]], beta, d], {i, 1, Length[DATA] - 1}, {j, i + 1, Length[DATA]}]; FSI);

DE2[a_, b_, band_, beta_, d_, DATA_] := (D2R = 0;
  D1Set = Split[DATA, #1[[3 ;; 4]] == #2[[3 ;; 4]] &];
  Do[
    D2R += GeoW[{a, b}, D1Set[[i]][[1]], band] * (1 / (Total[D1Set[[i]][[All, 2]]] - 1)) * GTDE2[beta, d, D1Set[[i]], {i, 1, Length[D1Set]}];
  D2R);

InLik[x_, beta_] :=
  Binomial[x[[1]], 2] * Log[op11[x, beta]] + x[[1]] * (x[[2]] - x[[1]]) * Log[op10[x, beta]] + Binomial[x[[2]] - x[[1]], 2] * Log[op00[x, beta]];
OutLik[x_, y_, beta_, d_] := x[[1]] * y[[1]] * Log[p11[x, y, beta, d]] + x[[1]] * (y[[2]] - y[[1]]) * Log[p10[x, y, beta, d]] +
  y[[1]] * (x[[2]] - x[[1]]) * Log[p01[x, y, beta, d]] + (x[[2]] - x[[1]]) * (y[[2]] - y[[1]]) * Log[p00[x, y, beta, d]];
GTLik[beta_, d_, DATA_] := (1 / (Total[DATA[[All, 2]]] - 1)) * (L = 0;
  Do[L += InLik[DATA[[i]], beta], {i, 1, Length[DATA]}];
  Do[L += OutLik[DATA[[i]], DATA[[j]], beta, d], {i, 1, Length[DATA] - 1}, {j, i + 1, Length[DATA]}]; L);
Lik[a_, b_, band_, beta_, d_, DATA_] := (Lik1 = 0;
  D1Set = Split[DATA, #1[[3 ;; 4]] == #2[[3 ;; 4]] &];
  Do[Lik1 += GeoW[{a, b}, D1Set[[i]][[1]], band] * GTLik[beta, d, D1Set[[i]], {i, 1, Length[D1Set]}]; Lik1);

FinCom[a_, d_, u_, v_, band_, DATA_] := (beta = a;
  Do[beta = N[beta - Inverse[N[DE2[u, v, band, beta, d, DATA]]].N[DE1[u, v, band, beta, d, DATA]]];
  Print[beta];
  Print[N[Lik[u, v, band, beta, d, DATA]], {i, 7}]);
BetaFinCom[a_, d_, u_, v_, band_, DATA_] := (beta = a;
  Do[beta = N[beta - Inverse[N[DE2[u, v, band, beta, d, DATA]]].N[DE1[u, v, band, beta, d, DATA]], {i, 7}]; beta)

```

```

LikFinCom[d_, u_, v_, band_, DATA_] := (beta = Table[0, {n, Length[DATA[[1]]] - 5];
Do[beta = N[beta - Inverse[N[DE2[u, v, band, beta, d, DATA]]].N[DE1[u, v, band, beta, d, DATA]]], {i, 7}];
N[Lik[u, v, band, beta, d, DATA]])

PlotLik[a_, b_, n_, u_, v_, band_, DATA_] := (A = Table[0, {i, a, b, n}];
Do[A[[Round[(i - a)/n] + 1]]] = LikFinCom[i, u, v, band, DATA], {i, a, b, n}];
ListLinePlot[Transpose[Join[{Table[i, {i, a, b, n}], {A}}], AxesLabel -> {Autocorrelation Parameter, Log - Likelihood}, ImageSize -> Large])

ResAP[a_, b_, n_, u_, v_, band_, DATA_] := (ArP = Table[0, {i, a, b, n}];
Pamd = Table[0, {i, a, b, n}];
Do[ArP[[Round[(i - a)/n] + 1]]] = LikFinCom[i, u, v, band, DATA], {i, a, b, n}];
Do[If[ArP[[j]] == Max[ArP], Pamd[[j]] = (j - 1) * n + a, Pamd[[j]] = 0], {j, 1, Length[ArP]}];
Total[Pamd]);

BetaM[Ini_, a_, b_, u_, v_, band_, DATA_] := Manipulate[BetaFinCom[Ini, d, u, v, band, DATA], {d, a, b}]

DEV[u_, v_, band_, beta_, d_, DATA_] := (D1V = 0;
D1Set = Split[DATA, #1[[3 ;; 4]] == #2[[3 ;; 4]] &];
Do[D1V += (GeoW[{u, v}, D1Set[[i]][[1]], band]^2) * Outer[Times, (1 / (Total[D1Set[[i]][[All, 2]]] - 1)) * GTDE1[beta, d, D1Set[[i]],
(1 / (Total[D1Set[[i]][[All, 2]]] - 1)) * GTDE1[beta, d, D1Set[[i]]], {i, 1, Length[D1Set]}];
D1V);
RawVar[u_, v_, band_, d_, DATA_] :=
Inverse[N[DE2[u, v, band, BetaFinCom[Table[0, {n, Length[DATA[[1]]] - 5}], d, u, v, band, DATA], d, DATA]]].
DEV[u, v, band, BetaFinCom[Table[0, {n, Length[DATA[[1]]] - 5}], d, u, v, band, DATA], d, DATA].
Inverse[N[DE2[u, v, band, BetaFinCom[Table[0, {n, Length[DATA[[1]]] - 5}], d, u, v, band, DATA], d, DATA]]];

RawTe[u_, v_, band_, d_, DATA_] := (B = Table[0, {n, Length[DATA[[1]]] - 5];
beta = BetaFinCom[Table[0, {n, Length[DATA[[1]]] - 5}], d, u, v, band, DATA];
betaVar = RawVar[u, v, band, d, DATA];
Do[
B[[i]] = N[beta[[i]] - 1.96 * N[Sqrt[betaVar[[i]][[i]]]] < 0 < N[beta[[i]] + 1.96 * N[Sqrt[betaVar[[i]][[i]]]], {i, 1, Length[DATA[[1]]] - 5};
B);

PaDEV[u_, v_, band_, betaa_, betab_, d_, DATAa_, DATAb_] := (PaD1V = 0;
D1Set = Split[DATAa, #1[[3 ;; 4]] == #2[[3 ;; 4]] &];
D2Set = Split[DATAb, #1[[3 ;; 4]] == #2[[3 ;; 4]] &];
Do[If[D1Set[[i]][[1]][[3 ;; 4]] == D2Set[[j]][[1]][[3 ;; 4]],
PaD1V += (GeoW[{u, v}, D1Set[[i]][[1]], band]^2) * Outer[Times, (1 / (Total[D1Set[[i]][[All, 2]]] - 1)) * GTDE1[betaa, d, D1Set[[i]],
(1 / (Total[D2Set[[j]][[All, 2]]] - 1)) * GTDE1[betab, d, D2Set[[j]]],
PaD1V += 0], {i, 1, Length[D1Set]}, {j, 1, Length[D2Set]}];
PaD1V);

```

```

PaRawCv[u_, v_, band_, betaa_, betab_, d_, DATAa_, DATAb_] := Inverse[N[DE2[u, v, band, betaa, d, DATAa]]];
PaDEV[u, v, band, betaa, betab, d, DATAa, DATAb].Inverse[N[DE2[u, v, band, betab, d, DATAb]]];

RawEs[Tim_, tao_, d_, u_, v_, band_, DATA_] := (betaa = Table[0, {j, Length[DATA[[1]]] - 5];
betaH = Table[betaa, {j, Length[Tim]}];
ste = 1; Do[betaH[[ste]] = BetaFinCom[betaa, d, u, v, band, TNear[t, tao, DATA]]; ste += 1, {t, Tim}); betaH);

RawCv[Tim_, tao_, d_, u_, v_, band_, betaS_, DATA_] := Table[PaRawCv[u, v, band, betaS[[i]],
betaS[[j]], d, TNear[Tim[[i]], tao, DATA], TNear[Tim[[j]], tao, DATA]], {i, Length[Tim]}, {j, Length[Tim]}];

RefineEs[t_, p_, h_, Tim_, betaS_] := (DesM = Table[Table[0, {j, 0, p}], {i, Length[Tim]}];
Do[DesM[[n]] = Table[Tim[[n]]^m, {m, 0, p}], {n, Length[Tim]}];
Omig = DiagonalMatrix[Table[Ker[(t-1)/h], {l, Tim}]];
Table[t^j, {j, 0, p}].Inverse[Transpose[DesM].Omig.DesM].Transpose[DesM].Omig.betaS);

RefineVar[t_, p_, h_, Tim_, Cv_] := (A = 0;
DesM = Table[Table[0, {j, 0, p}], {i, Length[Tim]}];
Do[DesM[[n]] = Table[Tim[[n]]^m, {m, 0, p}], {n, Length[Tim]}];
Omig = DiagonalMatrix[Table[Ker[(t-1)/h], {l, Tim}]];
Do[A += (Table[t^j, {j, 0, p}].Inverse[Transpose[DesM].Omig.DesM].Transpose[DesM].Omig[[i]]) * (Table[t^j, {j, 0, p}].
Inverse[Transpose[DesM].Omig.DesM].Transpose[DesM].Omig[[j]]) * Cv[[i, j]], {i, 1, Length[Tim]}, {j, 1, Length[Tim]}];
A)

PlotRefine[a_, b_, n_, p_, h_, Tim_, betaS_, Cv_] := Plot[{RefineEs[x, p, h, Tim, betaS][[n]] - 1.96 * Sqrt[RefineVar[x, p, h, Tim, Cv][[n, n]]],
RefineEs[x, p, h, Tim, betaS][[n]], RefineEs[x, p, h, Tim, betaS][[n]] + 1.96 * Sqrt[RefineVar[x, p, h, Tim, Cv][[n, n]]]},
{x, a, b}, Filling -> {1 -> {3}}, AxesLabel -> {Time, Beta}, ImageSize -> Large];

```

### Now we import our data, please point to your own address

```

DA = Import["(*please specify the address here*).xlsx"][[1]];
DA = Drop[DA, 1]; (*drop the head*)

```

As specified in the paper, the temporal correlation parameter is determined by exhaustive search, this can be done by function “LikFinCom”, “LikFinCom” can give us the value of the log-likelihood given any location and the temporal correlation parameter. In the following example, we are going to calculate the log-likelihood of France with coordinates (46,2) when the temporal correlation parameter is -0.4. Note that the correlation structure adopted here is AR(1) correlation structure

```

LikFinCom[-0.4(*the pre-defined temporal correlation parameter*), 46(*latitude of France*),
2(*longitude of France*), 1450(*geographical bandwidth*), DA(*our data set*)]
-124698.

```

In our paper, we search the correlation parameter in -1 to 1 with a step-size of 0.01, the largest log-likelihood of France and Thailand are presented as follows

```
LikFinCom[0.17(*the parameter which gives the largest log-likelihood when searching step-size is 0.01*),
  46(*latitude of France*), 2(*longitude of France*), 1450, DA]
-124 036.
```

```
LikFinCom[0.19(*the parameter which gives the largest log-likelihood when searching step-size is 0.01*),
  15(*latitude of Thailand*), 100(*longitude of Thailand*), 1450, DA]
-15 316.6
```

As specified in the paper, the geographical bandwidth is 1450 and the temporal correlation parameter is 0.17 for France and 0.19 for Thailand. We can now compute the raw estimator and its log-likelihood value by using function “FinCom”. See the following example, we will calculate the raw estimator for France in Jan-2012 (time index 25):

```
FinCom[{0, 0, 0}(*specify the initial value for intercept, temperature, precipitation and RH*), 0.17
  (*temporal correlation parameter*), 46(*latitude*), 2(*longitude*), 1450(*geographical bandwidth*),
  TNear[25(*specify the time index*), 3(*specify the  $\tau$  of the  $\tau$ -nearest temporal set*), DA(*our data set*)]]
{1.74831, -0.064805, -0.00432249, -3.03936}
-33 695.
{3.67617, -0.104106, -0.00901672, -5.24608}
-32 030.1
{4.34401, -0.112787, -0.0120615, -5.94532}
-31 877.3
{4.40476, -0.113085, -0.0126516, -6.00112}
-31 874.3
{4.40551, -0.113084, -0.0126666, -6.00159}
-31 874.3
{4.40551, -0.113085, -0.0126666, -6.00159}
-31 874.3
{4.40551, -0.113085, -0.0126666, -6.00159}
-31 874.3
```

### Now we show the example of France as what we present in the paper

We need first compute all raw estimators by using function “RawEs”. Note that time index 25 relates to Jan-2012 and time index 48 relates to Dec-2013, the geographical center of France has coordinates (46,2), we skip time index 33 because of insufficient samples, the loss would be offset by smoothing the raw estimators, the result is stored in “Es”

```
Es = RawEs[{25, 26, 27, 28, 29, 30, 31, 32, 34, 35, 36, 37, 38, 39, 40, 41, 42, 43, 44, 45, 46, 47, 48}
  (*specify the time index set, here we would attain raw estimators from Jan-2012 to Dec-2013 except Sep-2012*),
  3(*specify the  $\tau$  of the  $\tau$ -nearest temporal set*), 0.17(*temporal correlation parameter*),
  46(*latitude*), 2(*longitude*), 1450(*geographical bandwidth*), DA(*our data set*)];
```

We now compute the corresponding covariance of the raw estimator by using function "RawCv", the result is stored in "Cv"

```
Cv = RawCv[{25, 26, 27, 28, 29, 30, 31, 32, 34, 35, 36, 37, 38, 39, 40, 41, 42, 43, 44, 45, 46, 47, 48}(*specify the time index set,
here we would attain the covariance of raw estimators from Jan-2012 to Dec-2013 except Sep-2012*), 3
(*specify the  $\tau$  of the  $\tau$ -nearest temporal set*), 0.17(*temporal correlation parameter*), 46(*latitude*), 2
(*longitude*), 1450(*geographical bandwidth*), Es(*the value of raw estimators*), DA(*our data set*)];
```

We can refine the raw estimator by using function "RefineEs", which is the GWTCLR estimator. In the following example, we are going to compute the refined estimator in Jan-2012 for France, note that we re-define the time index set (1 relates to Jan-2012 and 24 relates to Dec-2013).

```
RefineEs[1.0(*specify the time index of refined estimator, here we specify Jan-2012,
note that you can input any real number between 1 and 24*), 2(*order of the smoothing kernel*), 4
(*bandwidth of the smoothing kernel*), {1, 2, 3, 4, 5, 6, 7, 8, 9, 11, 12, 13, 14, 15, 16, 17, 18, 19, 20, 21, 22, 23, 24}
(*specify the time index set*), Es(*the value of raw estimators*)]
{4.53588, -0.076548, -0.0133913, -6.51661}
```

We can also refine the covariance of the raw estimator by using function "RefineVar". In the following example, we are going to compute the refined covariance in Jan-2012 for France, note that we re-define the time index set (1 relates to Jan-2012 and 24 relates to Dec-2013).

```
RefineVar[1.0(*specify the time index of refined estimator, here we specify Jan-2012,
note that you can input any real number between 1 and 24*), 2(*order of the smoothing kernel*), 4
(*bandwidth of the smoothing kernel*), {1, 2, 3, 4, 5, 6, 7, 8, 9, 11, 12, 13, 14, 15, 16, 17, 18, 19, 20, 21, 22, 23, 24}
(*specify the time index set*), Cv(*the value of original covariance*)]
{{10.1674, -0.187401, -0.00334813, -12.3211}, {-0.187401, 0.00357939, 0.0000458471, 0.226804},
{-0.00334813, 0.0000458471, 6.19366  $\times 10^{-6}$ , 0.00412306}, {-12.3211, 0.226804, 0.00412306, 14.9486}}
```



Now we can draw the graph to see how does the coefficient change from Jan-2012 to Dec-2013

(\*For coefficient of temperature\*)

```
Plot[{RefineEs[x, 2, 4, {1, 2, 3, 4, 5, 6, 7, 8, 10, 11, 12, 13, 14, 15, 16, 17, 18, 19, 20, 21, 22, 23, 24}, Es][[
  2(*temperature is the second element of the estimator*)]] -
  1.96* Sqrt[RefineVar[x, 2, 4, {1, 2, 3, 4, 5, 6, 7, 8, 10, 11, 12, 13, 14, 15, 16, 17, 18, 19, 20, 21, 22, 23, 24}, Cv][[2, 2]]],
  RefineEs[x, 2, 4, {1, 2, 3, 4, 5, 6, 7, 8, 10, 11, 12, 13, 14, 15, 16, 17, 18, 19, 20, 21, 22, 23, 24}, Es][[2]],
  RefineEs[x, 2, 4, {1, 2, 3, 4, 5, 6, 7, 8, 10, 11, 12, 13, 14, 15, 16, 17, 18, 19, 20, 21, 22, 23, 24}, Es][[2]] +
  1.96* Sqrt[RefineVar[x, 2, 4, {1, 2, 3, 4, 5, 6, 7, 8, 10, 11, 12, 13, 14, 15, 16, 17, 18, 19, 20, 21, 22, 23, 24}, Cv][[2, 2]]],
  {x, 1, 24}, Filling -> {1 -> {3}}, AxesLabel -> {"Month Since 2012", "Coefficient of Temperature"}, ImageSize -> Large,
  Exclusions -> {1, 2, 3, 4, 5, 6, 7, 8, 9, 10, 11, 12, 13, 14, 15, 16, 17, 18, 19, 20, 21, 22, 23, 24}, PlotLabel -> "(A)"]
```

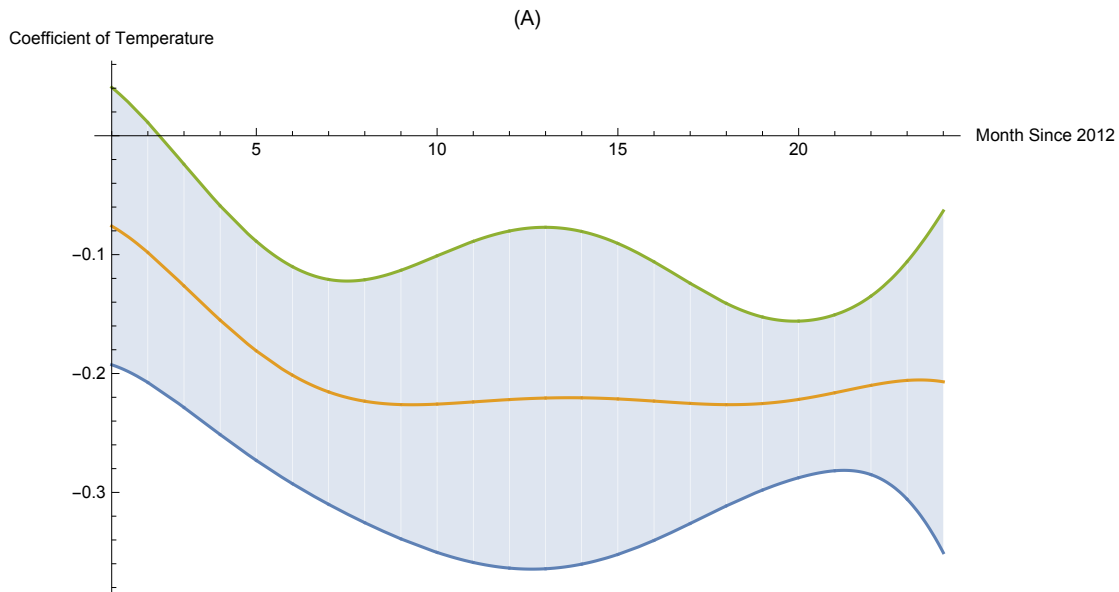

(\*For coefficient of precipitation\*)

```
Plot[{RefineEs[x, 2, 4, {1, 2, 3, 4, 5, 6, 7, 8, 10, 11, 12, 13, 14, 15, 16, 17, 18, 19, 20, 21, 22, 23, 24}], Es][[
  3(*precipitation is the third element of the estimator*)]] -
  1.96 * Sqrt[RefineVar[x, 2, 4, {1, 2, 3, 4, 5, 6, 7, 8, 10, 11, 12, 13, 14, 15, 16, 17, 18, 19, 20, 21, 22, 23, 24}], Cv][[3, 3]],
  RefineEs[x, 2, 4, {1, 2, 3, 4, 5, 6, 7, 8, 10, 11, 12, 13, 14, 15, 16, 17, 18, 19, 20, 21, 22, 23, 24}], Es][[3]],
  RefineEs[x, 2, 4, {1, 2, 3, 4, 5, 6, 7, 8, 10, 11, 12, 13, 14, 15, 16, 17, 18, 19, 20, 21, 22, 23, 24}], Es][[3]] +
  1.96 * Sqrt[RefineVar[x, 2, 4, {1, 2, 3, 4, 5, 6, 7, 8, 10, 11, 12, 13, 14, 15, 16, 17, 18, 19, 20, 21, 22, 23, 24}], Cv][[3, 3]]],
  {x, 1, 24}, Filling -> {1 -> {3}}, AxesLabel -> {"Month Since 2012", "Coefficient of Precipitation"}, ImageSize -> Large,
  Exclusions -> {1, 2, 3, 4, 5, 6, 7, 8, 9, 10, 11, 12, 13, 14, 15, 16, 17, 18, 19, 20, 21, 22, 23, 24}, PlotLabel -> "(B)"]
```

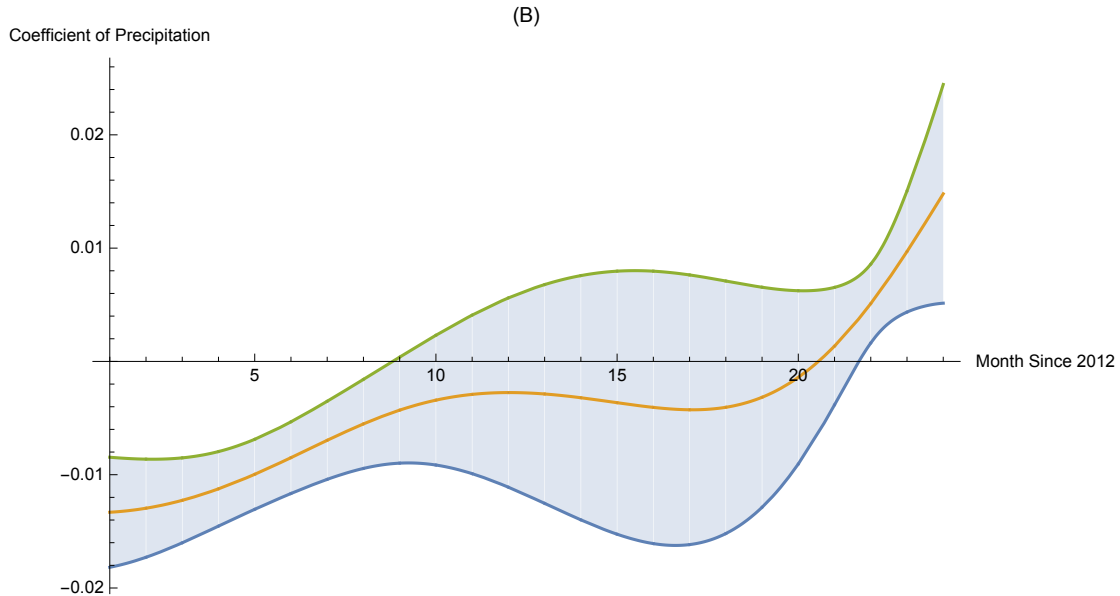

(\*For coefficient of RH\*)

```
Plot[{RefineEs[x, 2, 4, {1, 2, 3, 4, 5, 6, 7, 8, 10, 11, 12, 13, 14, 15, 16, 17, 18, 19, 20, 21, 22, 23, 24}], Es][[
  4(*RH is the fourth element of the estimator*)]] -
  1.96 * Sqrt[RefineVar[x, 2, 4, {1, 2, 3, 4, 5, 6, 7, 8, 10, 11, 12, 13, 14, 15, 16, 17, 18, 19, 20, 21, 22, 23, 24}], Cv][[4, 4]],
  RefineEs[x, 2, 4, {1, 2, 3, 4, 5, 6, 7, 8, 10, 11, 12, 13, 14, 15, 16, 17, 18, 19, 20, 21, 22, 23, 24}], Es][[4]],
  RefineEs[x, 2, 4, {1, 2, 3, 4, 5, 6, 7, 8, 10, 11, 12, 13, 14, 15, 16, 17, 18, 19, 20, 21, 22, 23, 24}], Es][[4]] +
  1.96 * Sqrt[RefineVar[x, 2, 4, {1, 2, 3, 4, 5, 6, 7, 8, 10, 11, 12, 13, 14, 15, 16, 17, 18, 19, 20, 21, 22, 23, 24}], Cv][[4, 4]]],
  {x, 1, 24}, Filling -> {1 -> {3}}, AxesLabel -> {"Month Since 2012", "Coefficient of Relative Humidity"}, ImageSize -> Large,
  Exclusions -> {1, 2, 3, 4, 5, 6, 7, 8, 9, 10, 11, 12, 13, 14, 15, 16, 17, 18, 19, 20, 21, 22, 23, 24}, PlotLabel -> "(C)"]
```

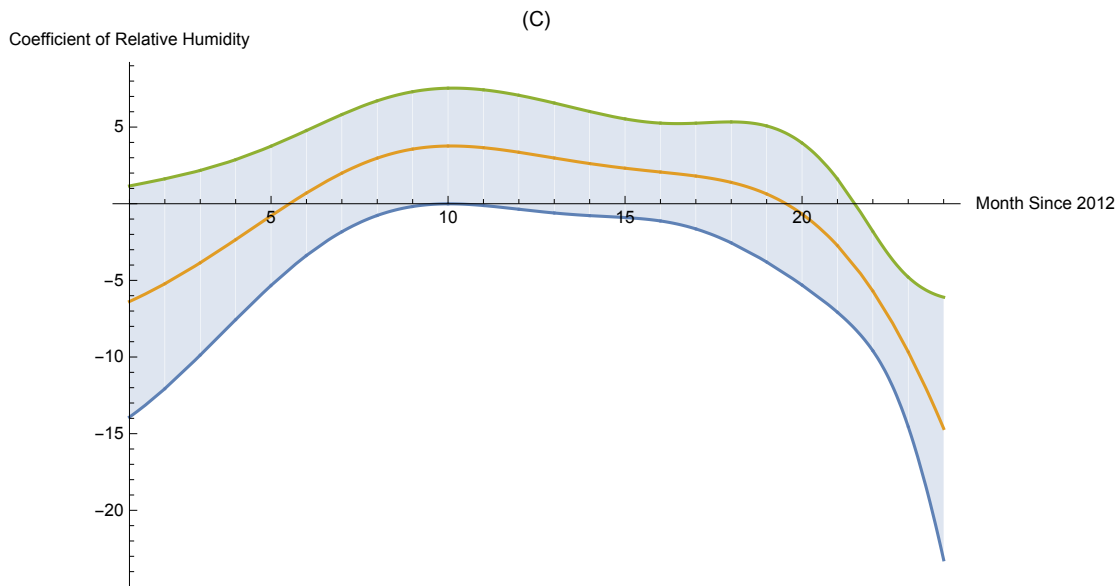

**Now we show the example of Thailand as what we present in the paper, the process is same as France**

Note that the geographical center of Thailand has coordinates (15,100), and the temporal correlation parameter is 0.19

```
Es2 = RawEs[{25, 26, 27, 28, 29, 30, 31, 32, 34, 35, 36, 37, 38, 39, 40, 41, 42, 43, 44, 45, 46, 47, 48}, 3, 0.19, 15, 100, 1450, DA];
Cv2 = RawCv[{25, 26, 27, 28, 29, 30, 31, 32, 34, 35, 36, 37, 38, 39, 40, 41, 42, 43, 44, 45, 46, 47, 48}, 3, 0.19, 15, 100, 1450, Es2, DA];
```

(\*For coefficient of temperature\*)

```
Plot[{RefineEs[x, 2, 3, {1, 2, 3, 4, 5, 6, 7, 8, 10, 11, 12, 13, 14, 15, 16, 17, 18, 19, 20, 21, 22, 23, 24}], Es2][[2]] -
  1.96*sqrt[RefineVar[x, 2, 3, {1, 2, 3, 4, 5, 6, 7, 8, 10, 11, 12, 13, 14, 15, 16, 17, 18, 19, 20, 21, 22, 23, 24}], Cv2][[2, 2]],
  RefineEs[x, 2, 3, {1, 2, 3, 4, 5, 6, 7, 8, 10, 11, 12, 13, 14, 15, 16, 17, 18, 19, 20, 21, 22, 23, 24}], Es2][[2]],
  RefineEs[x, 2, 3, {1, 2, 3, 4, 5, 6, 7, 8, 10, 11, 12, 13, 14, 15, 16, 17, 18, 19, 20, 21, 22, 23, 24}], Es2][[2]] +
  1.96*sqrt[RefineVar[x, 2, 3, {1, 2, 3, 4, 5, 6, 7, 8, 10, 11, 12, 13, 14, 15, 16, 17, 18, 19, 20, 21, 22, 23, 24}], Cv2][[2, 2]]],
  {x, 1, 24}, Filling -> {1 -> {3}}, AxesLabel -> {"Month Since 2012", "Coefficient of Temperature"}, ImageSize -> Large,
  Exclusions -> {1, 2, 3, 4, 5, 6, 7, 8, 9, 10, 11, 12, 13, 14, 15, 16, 17, 18, 19, 20, 21, 22, 23, 24}, PlotLabel -> "(A)"]
```

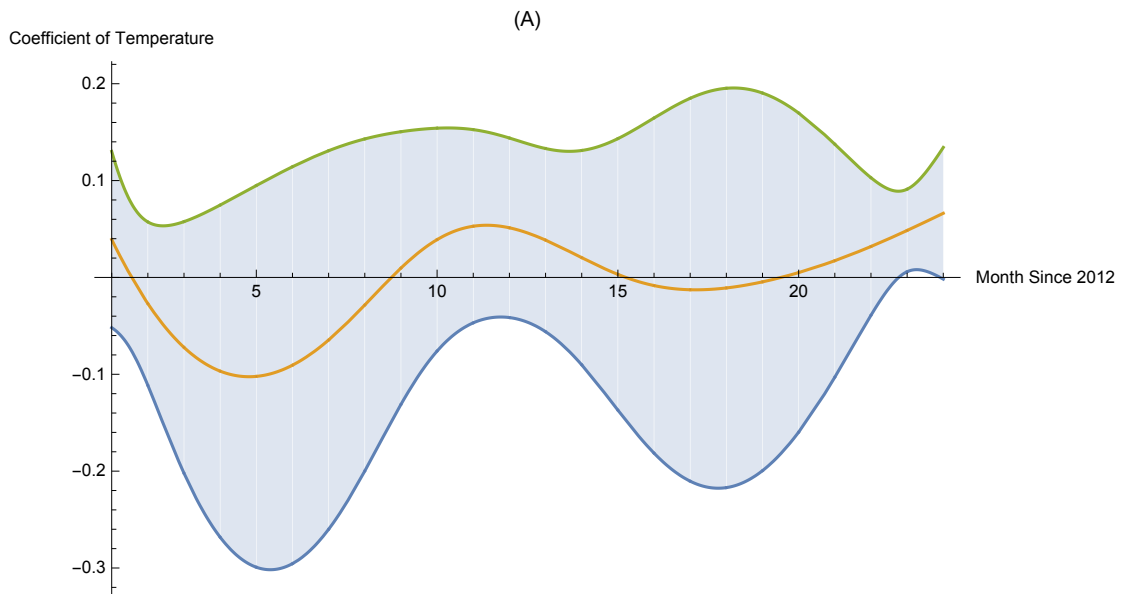

(\*For coefficient of precipitation\*)

```

Plot[{RefineEs[x, 2, 3, {1, 2, 3, 4, 5, 6, 7, 8, 10, 11, 12, 13, 14, 15, 16, 17, 18, 19, 20, 21, 22, 23, 24}, Es2][[3]] -
  1.96 * Sqrt[RefineVar[x, 2, 3, {1, 2, 3, 4, 5, 6, 7, 8, 10, 11, 12, 13, 14, 15, 16, 17, 18, 19, 20, 21, 22, 23, 24}, Cv2][[3, 3]]],
  RefineEs[x, 2, 3, {1, 2, 3, 4, 5, 6, 7, 8, 10, 11, 12, 13, 14, 15, 16, 17, 18, 19, 20, 21, 22, 23, 24}, Es2][[3]],
  RefineEs[x, 2, 3, {1, 2, 3, 4, 5, 6, 7, 8, 10, 11, 12, 13, 14, 15, 16, 17, 18, 19, 20, 21, 22, 23, 24}, Es2][[3]] +
  1.96 * Sqrt[RefineVar[x, 2, 3, {1, 2, 3, 4, 5, 6, 7, 8, 10, 11, 12, 13, 14, 15, 16, 17, 18, 19, 20, 21, 22, 23, 24}, Cv2][[3, 3]]],
{x, 1, 24}, Filling -> {1 -> {3}}, AxesLabel -> {"Month Since 2012", "Coefficient of Precipitation"}, ImageSize -> Large,
Exclusions -> {1, 2, 3, 4, 5, 6, 7, 8, 9, 10, 11, 12, 13, 14, 15, 16, 17, 18, 19, 20, 21, 22, 23, 24}, PlotLabel -> "(B)"}

```

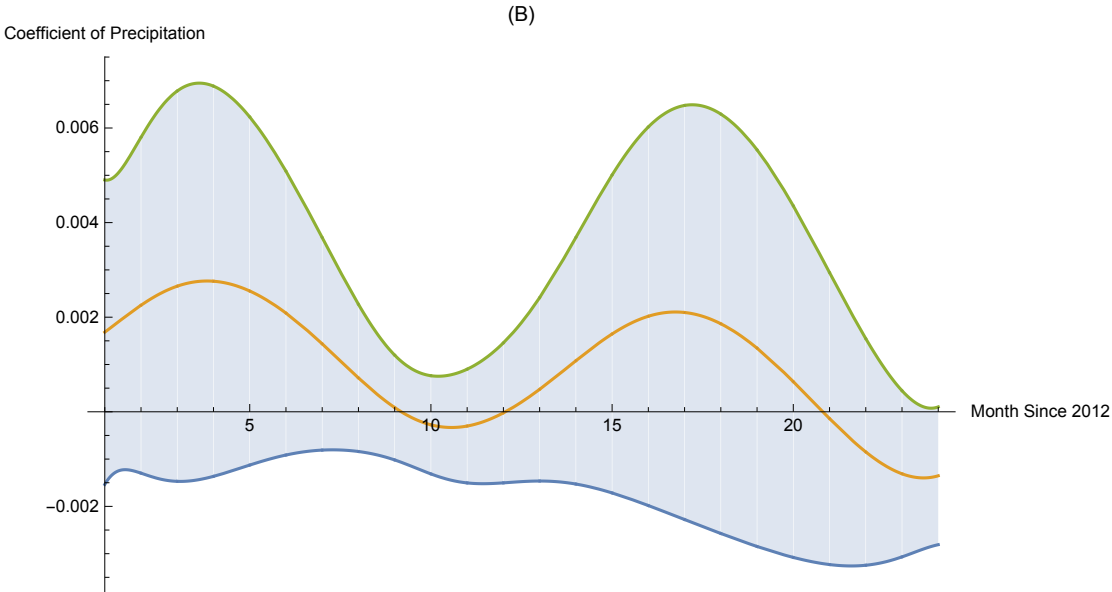

(\*For coefficient of RH\*)

```

Plot[{RefineEs[x, 2, 3, {1, 2, 3, 4, 5, 6, 7, 8, 10, 11, 12, 13, 14, 15, 16, 17, 18, 19, 20, 21, 22, 23, 24}, Es2][[4]] -
  1.96 * Sqrt[RefineVar[x, 2, 3, {1, 2, 3, 4, 5, 6, 7, 8, 10, 11, 12, 13, 14, 15, 16, 17, 18, 19, 20, 21, 22, 23, 24}, Cv2][[4, 4]]],
  RefineEs[x, 2, 3, {1, 2, 3, 4, 5, 6, 7, 8, 10, 11, 12, 13, 14, 15, 16, 17, 18, 19, 20, 21, 22, 23, 24}, Es2][[4]],
  RefineEs[x, 2, 3, {1, 2, 3, 4, 5, 6, 7, 8, 10, 11, 12, 13, 14, 15, 16, 17, 18, 19, 20, 21, 22, 23, 24}, Es2][[4]] +
  1.96 * Sqrt[RefineVar[x, 2, 3, {1, 2, 3, 4, 5, 6, 7, 8, 10, 11, 12, 13, 14, 15, 16, 17, 18, 19, 20, 21, 22, 23, 24}, Cv2][[4, 4]]],
{x, 1, 24}, Filling -> {1 -> {3}}, AxesLabel -> {"Month Since 2012", "Coefficient of Relative Humidity"}, ImageSize -> Large,
Exclusions -> {1, 2, 3, 4, 5, 6, 7, 8, 9, 10, 11, 12, 13, 14, 15, 16, 17, 18, 19, 20, 21, 22, 23, 24}, PlotLabel -> "(C)"}

```

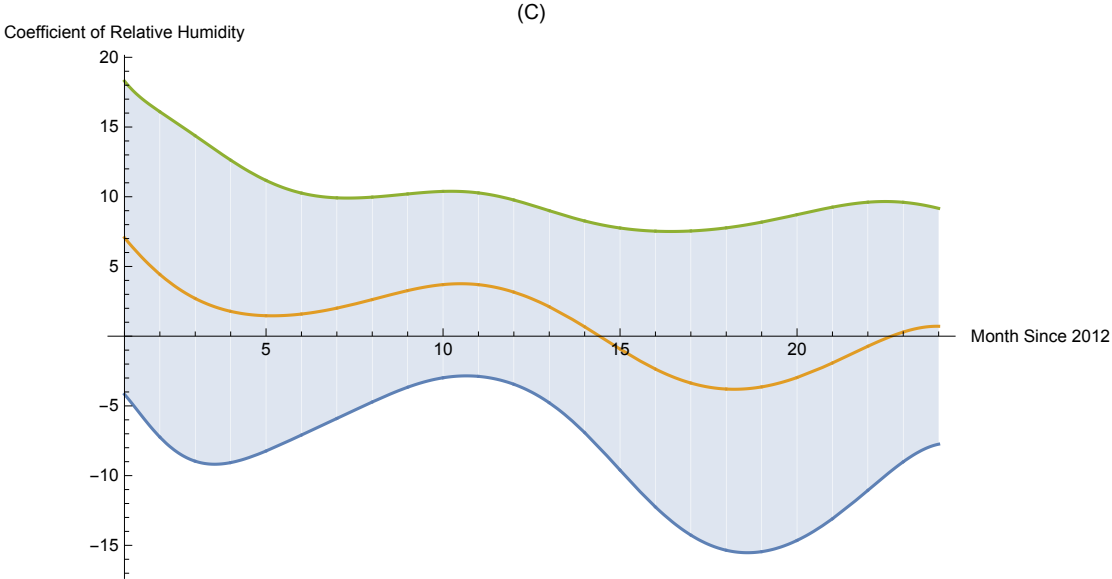

Now we show how to project these result to the map

Please first run the following code to import the raw estimator of the 22 countries

```

Es1 = {{4.3103790750280755', -0.09347943468376584', -0.012856250085036752', -6.010140404085008'},
{3.8063808224067093', -0.08257602302979479', -0.013530860694731032', -5.384515284270297'},
{2.8875796667110185', -0.07217296018150102', -0.014575362686395253', -4.167394276079998'},
{2.638777990665243', -0.08352180227361924', -0.011330857083901625', -3.8840146877605544'},
{2.757436722652374', -0.10271030572445354', -0.009126044750950569', -3.908420899988653'},
{0.2506747018476168', -0.23066058687164204', -0.01497970618866562', 1.617265406425387'},
{5.716866584881538', -0.38211626167156765', -0.011996933702432067', -4.149101374670637'},
{-3.592399378560568', -0.08996111868408274', 0.002218711725136751', 0.5122139358643778'},
{-10.132973805971403', -0.17100211226275952', 0.0028746143946025687', 10.266862811992262'},
{-1.5301437848488224', -0.17590826499043113', -0.0036987657824508304', 1.5435083087051047'},
{0.011148624851505539', -0.17115255538160973', -0.0012837956532694283', -0.4166337916683993'},
{0.32137462427711866', -0.15357835696515842', -0.002903705614663258', -0.6661671257330513'},
{0.029080250896879056', -0.1485554601702332', -0.0027569877261937976', -0.34577219757636235'},
{-0.8100617624677771', -0.12673066928685994', -0.0024590293119852082', 0.6243823171547414'},
{-1.6116467221206545', -0.12448118601485417', -0.00030055726289942745', 1.4789962659836184'},
{-2.5218947202878894', -0.14841475149411407', 0.00108906549278368', 2.7135490744475677'},
{-0.3215602341174306', -0.21251924852554513', 0.003697499472991376', -0.030583920064506078'},
{5.743422727124703', -0.36945061742234075', -0.01782283639639022', -4.221924681256512'},
{-1.9079090527964557', -0.0946591844475363', 0.005938326634114265', -2.496679280685416'},
{-5.361981720682678', -0.11308758326096915', 0.0011856185038383892', 2.547362407914159'},
{3.1139311842570656', -0.18339458370040967', 0.011443504804660902', -7.158908471971672'},
{7.38360900965705', -0.19203949830218303', 0.011213180950898492', -11.500011910084428'},
{7.293838857555111', -0.15844940567579802', 0.008914834055786783', -11.212460573572491'}};
Es2 = {{3.8888186150737822', -0.0800958366210289', -0.012700215686602314', -5.551819073406812'},
{3.4040922673396286', -0.0702531013990767', -0.013373489658605358', -4.939780295686611'},
{2.4332841783093273', -0.05946557840922183', -0.01492877781419557', -3.6195249271862773'},
{2.203357387917137', -0.07009299989344064', -0.01200266369544186', -3.347343836723367'},
{2.440160067482059', -0.09046397913772813', -0.009829369904128643', -3.5171646099107496'},
{0.2750697634473079', -0.20633799903546926', -0.015163500304869116', 1.3131572006099252'},
{5.717764177453933', -0.36119895559337767', -0.010453349899900877', -4.596259316564883'},
{-3.139731774352354', -0.09039196968086695', 0.0015062348405209599', 0.14766547389324555'},
{-9.82610435055227', -0.15551386008119225', 0.0033674677274289438', 9.791813704141392'},
{-1.450265604790142', -0.15645741215044043', -0.003237704270114152', 1.336076830902103'},
{-0.09920902939810337', -0.1499014169779841', -0.001070684391688141', -0.3719436193470835'},
{0.2238421906326439', -0.13174047541722655', -0.002663643152820062', -0.6341950027307447'},
{-0.0819033722316101', -0.12645240870926466', -0.0025467349756147857', -0.29330615023721035'},
{-0.9192415106292496', -0.1069261765623652', -0.002186828539889865', 0.6814086251914836'},
{-1.6283737925898087', -0.10757748387399352', -0.00023887060107892507', 1.4519364637289203'},
{-2.3464347754842545', -0.13489086088627655', 0.0009070543410230785', 2.4816786094931933'},
{0.35058534242818334', -0.1951787145771357', 0.0037130536397964957', -0.9968114904817613'},
{6.65657801061383', -0.3485149073267328', -0.014966342938341799', -5.92712570079975'},
{-0.11286885061339533', -0.10393385918596264', 0.006435821081483205', -4.549437820838602'},
{-4.630179484554941', -0.10730243810414376', 0.0020580571232003088', 1.5233492762349503'},
{3.155033509089904', -0.17461145132390407', 0.01115201804601052', -7.245283034555096'},
{6.7713007517415384', -0.18152817985313519', 0.010370127429767895', -10.711233385699309'},
{6.925961939242277', -0.14507957002553795', 0.008084856557472988', -10.72800213240081'}};
Es3 = {{3.367153334510832', -0.07104614652369946', -0.012819191323157808', -4.908616500546991'},
{2.869443191833921', -0.06068555890397713', -0.013488946237894123', -4.284716642360007'},
{1.807770756824798', -0.04826173500776917', -0.015162929866288253', -2.852015764382561'},
{1.6695708478691529', -0.06098013353484424', -0.012250961264718143', -2.685075745693242'},
{1.9109903792375023', -0.08178281559167257', -0.010129248502427534', -2.854011231626325'}};

```

```

{-0.22639000876672175`, -0.20476136782194515`, -0.015163066898477866`, 1.9972379838270016`},
{5.363219365476577`, -0.3569569074512709`, -0.010021546746547478`, -4.2064014043301245`},
{-3.3514391127959624`, -0.08543662045390077`, 0.0009943359186073261`, 0.5181091926997365`},
{-10.389819212541887`, -0.14828995231009046`, 0.0029492045705594824`, 10.429022236580035`},
{-1.8294010134715906`, -0.15247831549656826`, -0.003121627073035584`, 1.7675135396805552`},
{-0.27565308504932223`, -0.1465405210311227`, -0.001578119270154725`, -0.104233388900725`},
{0.03039871604742035`, -0.1269085352485253`, -0.003154703953850551`, -0.3469609445245941`},
{-0.28884548171987323`, -0.12166462183317875`, -0.003025347551096986`, 0.008525827463931874`},
{-1.1218045853367102`, -0.1031417918036863`, -0.002564045702354308`, 0.970588719726835`},
{-1.6318191120901178`, -0.10666039367111971`, -0.0009204398681249796`, 1.531811560048401`},
{-2.201119611779324`, -0.1384162538378741`, -0.00014954835784114468`, 2.426381660999198`},
{0.33782263937507373`, -0.19626902089490766`, 0.0024393731607025683`, -0.8235016468340481`},
{6.415059406258813`, -0.3624973026146968`, -0.01433831429638838`, -5.435096823084506`},
{0.8706422250016179`, -0.11899285662429393`, 0.005658706433212096`, -5.34990388178099`},
{-4.7606632767671115`, -0.10071631350642388`, 0.0023625439565873505`, 1.5958196832539318`},
{3.045747092406821`, -0.1755693326975927`, 0.010648357389939349`, -7.073162100845524`},
{6.984073203485453`, -0.18748110113153735`, 0.010330010862954604`, -10.927025130552536`},
{6.805420759484076`, -0.14620094424106214`, 0.0077802329606673675`, -10.505559721065627`}};
Es4 = {{4.121204393510064`, -0.0925540551222127`, -0.012939693213845312`, -5.759187779883073`},
{3.598349331420516`, -0.08082937778832903`, -0.01362671834416338`, -5.1162489814033645`},
{2.6355193653719353`, -0.06944340944379758`, -0.014581954399842266`, -3.857653159708239`},
{2.4300188643781113`, -0.08227154672477457`, -0.011209196912409977`, -3.627170335679289`},
{2.500990302045342`, -0.10114963387439643`, -0.009010654720712311`, -3.589437656995438`},
{-0.07035615110198334`, -0.23791818205755544`, -0.014931062793033125`, 2.148408288521682`},
{5.478745781995843`, -0.38576875710209957`, -0.012266378370072797`, -3.73946064137818`},
{-4.091184875474966`, -0.08395380342559619`, 0.0019687601021341748`, 1.116229588815853`},
{-10.621753578316627`, -0.17222040049126808`, 0.0024945814395506355`, 10.861086191105535`},
{-1.8703737083570173`, -0.18108725946911347`, -0.003704114509598711`, 1.968932190849872`},
{-0.10103013340568197`, -0.17766236100652605`, -0.0016245132297037417`, -0.2158816824578218`},
{0.2143703644068153`, -0.15904775482537417`, -0.0032639371917663213`, -0.4713362410569055`},
{-0.07780597494916658`, -0.15406329228288226`, -0.003106385316959204`, -0.15278877841037206`},
{-0.9140722376154121`, -0.1317105475578645`, -0.0027949708429918538`, 0.8086401181724208`},
{-1.6064610316804497`, -0.13006228133061673`, -0.0008430592323961317`, 1.5493553481027025`},
{-2.4418730208052937`, -0.15564390232283484`, 0.0003664924842222886`, 2.7130847290685463`},
{-0.5486149319190042`, -0.21951297679878096`, 0.0027414511049558454`, 0.41852797543693226`},
{5.303519284305773`, -0.3839847190440147`, -0.01836032168926792`, -3.3864447988016004`},
{-1.7945183201913752`, -0.1021585308263159`, 0.005087321949078795`, -2.390636212156205`},
{-5.741956982700421`, -0.11045443145037023`, 0.001114213370169746`, 2.990943928251542`},
{3.0074606211283914`, -0.18674501486723735`, 0.011111126915101277`, -6.979197450546001`},
{7.7326216984521645`, -0.19952092931923102`, 0.011426179315580244`, -11.902976401524311`},
{7.327233811094181`, -0.16421814133090695`, 0.008907615276544574`, -11.20129974342434`}};
Es5 = {{3.414192863543515`, -0.0925621857982154`, -0.012774556908721302`, -4.812041234905586`},
{2.764267552037932`, -0.07610413779915508`, -0.013563250431121934`, -4.047037177901257`},
{1.4868808191369138`, -0.05783586637941541`, -0.014258487586869257`, -2.4734609559704297`},
{1.5756873229238535`, -0.08013785349111519`, -0.01017996097142959`, -2.58871764637014`},
{1.5083687836340685`, -0.09931265268779085`, -0.008011198286956936`, -2.3598082174345376`},
{-0.9052316603234132`, -0.278582263115187`, -0.014701094173037532`, 3.768577641793453`},
{4.8459757403686`, -0.4004054200241587`, -0.013537508620606322`, -2.5085748136561707`},
{-5.8287005165874115`, -0.06381564585298011`, 0.0007217432032444607`, 3.2592881345348057`},
{-13.321249421218525`, -0.1868855815540351`, 0.0008280995036256558`, 14.151812942117381`},
{-3.1996883451153377`, -0.22234910690841422`, -0.0035290961108086056`, 3.7217179229848996`},
{-0.42219610197426033`, -0.22587180266057622`, -0.0021659676023466712`, 0.4805193558161953`},
{-0.05485755834412706`, -0.2007533432246846`, -0.0038399969516754494`, 0.1519303685639641`},
{-0.3371322693930685`, -0.1956063716929269`, -0.0036742551139536043`, 0.45352265962464594`},
{-1.1804783891788357`, -0.16842056992028615`, -0.003401596255934985`, 1.3949141615599157`},

```

{-1.5503180427576992', -0.16545659429727472', -0.0024625805307786942', 1.8208275837167638'},  
 {-2.049218085711466', -0.1939444250802396', -0.002753122743766805', 2.7066514467064295'},  
 {-1.6036053633088925', -0.2588591800602665', -0.002497729300069334', 2.640240586089156'},  
 {3.7071623255092603', -0.4356864290731326', -0.020833153247997886', -0.39445289405975137'},  
 {-1.0037931469289625', -0.13408909722191562', 0.001965836247227951', -2.4269848301368304'},  
 {-7.012977308251612', -0.10505319869360205', 0.000779028373202364', 4.509277552541969'},  
 {2.4362192464383816', -0.2044257632058189', 0.00982774764428368', -6.046315683200223'},  
 {10.38439550835637', -0.24416610552059234', 0.013100089152482484', -15.003741032465319'},  
 {7.724618740915079', -0.19874209282142127', 0.008797139264468058', -11.360911990476666'}];  
 Es6 = {{4.5831867029463025', -0.09302787898427993', -0.01248567675072682', -6.39429420767235'},  
 {4.112040073568708', -0.0836843434402713', -0.01315019706623841', -5.797239718721936'},  
 {3.246611565665256', -0.07471078934958093', -0.014472576027816954', -4.6168291954949625'},  
 {2.930674541758796', -0.08361083924248587', -0.011491555543414161', -4.2475793894327545'},  
 {3.1728469956199508', -0.10391106579949817', -0.009286030821707248', -4.429472328922515'},  
 {0.9799616520050064', -0.21409756070632796', -0.015096224795123533', 0.4054396145202635'},  
 {6.2958472446707034', -0.37077434641896373', -0.01122642954613373', -5.185131335977044'},  
 {-2.4695496000462605', -0.1022696864647481', 0.002404577132691406', -0.7964065058501292'},  
 {-9.270409474066213', -0.16661345422241514', 0.003741896841747063', 9.190637497252208'},  
 {-0.8540928673763413', -0.1647196985091306', -0.003554456051401168', 0.6892311974037549'},  
 {0.21055490499904278', -0.15710873726267635', -0.0004361298846753127', -0.7965340085071284'},  
 {0.517517356207522', -0.14114794886191062', -0.0019988532700197107', -1.0444843866178786'},  
 {0.22305910503589946', -0.1360004344406614', -0.0018857451024262145', -0.7168482940998298'},  
 {-0.623396259598239', -0.11541439664846416', -0.001612697024871531', 0.27297198502333686'},  
 {-1.622825945437165', -0.11212902789093673', 0.0007795921729165304', 1.3471302565809498'},  
 {-2.6059868568253437', -0.13348453529961923', 0.002305818422304252', 2.650860118884166'},  
 {0.22408700731876344', -0.19768978159768585', 0.005290145147617687', -1.0088936512338678'},  
 {6.916409237482304', -0.33649866743726004', -0.016263100896750093', -6.398974477904309'},  
 {-1.5547991171987743', -0.0837945034228882', 0.007711111102128407', -3.366783360812163'},  
 {-4.3706992132142', -0.11859179459785203', 0.001509333830061433', 1.362629257775387'},  
 {3.288764351193261', -0.17579883960980155', 0.012026502889861304', -7.4657686538595875'},  
 {6.761168395201504', -0.17759400026982902', 0.010728514806408792', -10.764338621896803'},  
 {7.183900368441053', -0.146389459967872', 0.008708424301052849', -11.145525659040487'}];  
 Es7 = {{3.4472127386274485', -0.08686501919440894', -0.012946298859155195', -4.89005910423097'},  
 {2.8654387465379854', -0.0727064333767838', -0.013671588394005915', -4.193004348559473'},  
 {1.711274074392409', -0.057363788328483906', -0.014524685293287341', -2.7342275739955766'},  
 {1.6961285158057073', -0.07588825994367487', -0.010802664447958112', -2.727518599039411'},  
 {1.7080992885347714', -0.09528126051409998', -0.008647118707113646', -2.6020000847964284'},  
 {-0.7524537759073008', -0.25702102150911516', -0.01483346590879256', 3.315596198253873'},  
 {4.98182930027445', -0.39047837475739405', -0.012758365864925427', -2.920084244151972'},  
 {-5.091332898377149', -0.07109257877207664', 0.000938155241375945', 2.425535005057815'},  
 {-12.207314333011015', -0.17337922494525415', 0.001494056791229657', 12.755621432622565'},  
 {-2.7300224516933214', -0.19641674090846067', -0.0035834023308104175', 3.056876115759789'},  
 {-0.3807421999181487', -0.19687666660306452', -0.0022241584847309537', 0.29697489521741843'},  
 {-0.04603915577432312', -0.17453415897926894', -0.003884453898849003', 0.015059458488290982'},  
 {-0.34376329756338364', -0.16956494058643032', -0.0037086897087446453', 0.3363354475373661'},  
 {-1.1806705407344646', -0.14597225431897468', -0.003337397751542322', 1.2818293760398851'},  
 {-1.5948922915833472', -0.1456047939671991', -0.002106302735261766', 1.748308573373668'},  
 {-2.1624044301620913', -0.17589885458685445', -0.0018582459034688927', 2.682796672008596'},  
 {-1.0502925675184078', -0.23914981883575334', -0.00044587652796230994', 1.566521323058338'},  
 {4.412317672287717', -0.41748704016680943', -0.019361662249381448', -1.667535042621008'},  
 {-0.8130640585364053', -0.12675667953222863', 0.00311225508066119', -2.9030168041786393'},  
 {-6.395301659659311', -0.10459913496673645', 0.001153705599081302', 3.725184176230549'},  
 {2.6661623636469147', -0.19554272210779086', 0.010172583959103688', -6.422764383982875'},  
 {8.991501565144885', -0.22307154570853005', 0.012093382867875674', -13.34536404475745'},  
 {7.4016562936327', -0.18074613005634207', 0.008594918782618104', -11.086302537269017'}];

Es8 = {{4.405512364361346', -0.11308463775087761', -0.01266656875663161', -6.001592098976982'},  
 {3.721597941760509', -0.09605725061126119', -0.013509932801315377', -5.195466260314368'},  
 {2.5771402063689437', -0.07978003328061702', -0.013907196584387412', -3.7957522438121933'},  
 {2.4747242474648075', -0.09844002028038637', -0.009732711920720468', -3.6943615292121494'},  
 {2.22271776566794', -0.1141163771848122', -0.007496452719378307', -3.259952533208452'},  
 {-0.671479555714288', -0.2915415750102334', -0.014521848024502425', 3.5788941139091923'},  
 {5.067591121365116', -0.4180963084633842', -0.014397497207228825', -2.5047786940704624'},  
 {-5.976365813148384', -0.06540619341067155', 0.002303235794423223', 3.100428414844203'},  
 {-13.001881470886541', -0.21001673810640417', 0.0008598909600291833', 13.90953296004907'},  
 {-3.0752676166790702', -0.2419697489878279', -0.0037994948452424993', 3.6489589741498785'},  
 {-0.22960813601639993', -0.24338148037875929', -0.001974688245047009', 0.2596699043685518'},  
 {0.128378430400368', -0.22012472474905107', -0.003640703412693398', -0.06331476165849853'},  
 {-0.11945808644422128', -0.21518247682981853', -0.0034947657847609116', 0.199424986692355'},  
 {-0.9528604779114669', -0.18397280394719828', -0.003467726818929546', 1.1316802363565992'},  
 {-1.487894690022602', -0.17687687653263', -0.0020770377375293734', 1.7014607351169633'},  
 {-2.212133274485438', -0.19881298533453842', -0.0014560915828436514', 2.7519346758839265'},  
 {-2.0708697189542256', -0.26654656523079995', -0.001191151353241173', 3.126257029843373'},  
 {3.3397369392526763', -0.4368893719728386', -0.022449156747747435', 0.2172477086886741'},  
 {-3.097556029833885', -0.1140872653010647', 0.001896128015493125', -0.26201395059343424'},  
 {-7.76106710906796', -0.11007393464738517', -0.00026324207964359934', 5.558018748812872'},  
 {2.5334896841306356', -0.20926646804340815', 0.010490118005729224', -6.1886101355370755'},  
 {10.714353357791076', -0.2465751230192387', 0.013866036837909268', -15.497189842964493'},  
 {8.239905098989214', -0.20668714214436537', 0.010091887837273328', -12.154274590701693}};

Es9 = {{3.1211960579217735', -0.0849029610473364', -0.012866412357583009', -4.46481392821235'},  
 {2.4977549757210866', -0.06917400044339611', -0.013614274889988887', -3.729318488301205'},  
 {1.1977252947378338', -0.05077926617333176', -0.014451020699195422', -2.1167284754315205'},  
 {1.3311141125932626', -0.07350150245540814', -0.01050849381319897', -2.2809268943664054'},  
 {1.3444217636708495', -0.09392703160703669', -0.008365443941724346', -2.1457092242786553'},  
 {-0.9599932627168711', -0.2701812563710551', -0.014776563354822515', 3.753127215049383'},  
 {4.819216358951371', -0.39277745635816075', -0.013060570533770141', -2.6186329255355267'},  
 {-5.45385858585044', -0.06678424840571288', 0.0003829962249020092', 2.936199201168237'},  
 {-13.234704053698126', -0.1765809133584132', 0.0009230347765775707', 13.990025904717958'},  
 {-3.1159322784065355', -0.2103527024160508', -0.003486478905179379', 3.580245007488149'},  
 {-0.457086606235043', -0.21350408056591008', -0.0022834545829324053', 0.49490048828122035'},  
 {-0.10404450837526588', -0.1885093511519399', -0.00394757981491262', 0.1860764385386451'},  
 {-0.40286789937050865', -0.18344959176413744', -0.0037713884934861682', 0.5069477868585972'},  
 {-1.2471102995342713', -0.15851319525887295', -0.003387848071747128', 1.450126795887452'},  
 {-1.5695171765408154', -0.1577078990465984', -0.0024918981514239318', 1.8305045584692428'},  
 {-2.021523863908313', -0.18893152340802344', -0.0029635673721896023', 2.688011743088103'},  
 {-1.3375808247392549', -0.252476810794166', -0.0024530564677793304', 2.2565568486288092'},  
 {3.9789512835197662', -0.43232067083122167', -0.01998207694552231', -0.8565152080683648'},  
 {-0.2459953846166952', -0.1392248273102338', 0.0023054144332467705', -3.281897359247397'},  
 {-6.631461123660552', -0.10324689444502112', 0.001167514067200874', 3.996697479226334'},  
 {2.4621689723336204', -0.2013255509069664', 0.009736410889841337', -6.095360634936822'},  
 {10.041893080625597', -0.23969184594675158', 0.012701530741953664', -14.566457451398971'},  
 {7.525715217051317', -0.1926159598044522', 0.008405640578587344', -11.095601728529541}};

Es10 = {{3.7066737054483765', -0.08261608678205457', -0.012942497087564944', -5.2741051497385225'},  
 {3.1923517171136475', -0.07123294919298812', -0.013620283431791303', -4.638751300934953'},  
 {2.1759853413470065', -0.059152783019881236', -0.014822142348022104', -3.2978853803199617'},  
 {2.0200839836464817', -0.07257309586616892', -0.011584314100379396', -3.1206698148813143'},  
 {2.1537910325872214', -0.092299878075407', -0.0094247689054841', -3.156235844013525'},  
 {-0.2306189074101163', -0.22650399378238958', -0.015025284269495252', 2.2476565060348945'},  
 {5.351499861165833', -0.3747028842971134', -0.011480947122104186', -3.7934391708354798'},  
 {-3.9657953345917205', -0.08255538887171723', 0.0013786936367332428', 1.1035168977035448'},  
 {-10.666594020494488', -0.16165332682265637', 0.0025704581484728467', 10.848495085808198'}}



{-1.9586802705375117', -0.17005299467335347', -0.0034638770516365676', 2.014965927883477'},  
 {-0.21249845702644782', -0.16628815045959', -0.0017095271250636315', -0.10362573306408679'},  
 {0.105058764174657', -0.14688478537266425', -0.0033368879400606', -0.3600422628858915'},  
 {-0.20016743406321802', -0.141786776016792', -0.0031833132819370606', -0.025035128263311796'},  
 {-1.0370232050448622', -0.12104819573424286', -0.002791627732464354', 0.93734417935672'},  
 {-1.6206748205875385', -0.12175843659287935', -0.0010603060335673674', 1.5727819146856916'},  
 {-2.3140017414648457', -0.1507019059111019', -0.00013515465834348776', 2.599135932824302'},  
 {-0.23103769681839986', -0.21205417781294456', 0.0022778517579115677', 0.022317410331553864'},  
 {5.620180481722192', -0.37988679738646947', -0.01692804180806394', -3.9571335857250705'},  
 {-0.6394502196965849', -0.11177937726524836', 0.00505350057157611', -3.5956082041523563'},  
 {-5.423116075440216', -0.105828558814025', 0.0016466288545533623', 2.5125629233840594'},  
 {2.983757016972453', -0.18292506151915733', 0.010783776603821139', -6.9515331648547445'},  
 {7.4939526560863285', -0.19654243508265964', 0.010992765804029832', -11.575048133647416'},  
 {7.090897657494067', -0.15825523089389787', 0.008367200700772327', -10.863848556697198'}];  
 Es11 = {{4.451997215578638', -0.09474255645606608', -0.012775724741904724', -6.193918322137051'},  
 {3.957973472473779', -0.084289084268172', -0.01344459036891392', -5.5774472677143825'},  
 {3.0655074661164665', -0.07445598289971554', -0.01453032402675125', -4.3865727131861485'},  
 {2.7907497662045757', -0.0849791558042531', -0.011350630447806225', -4.071564595175762'},  
 {2.9379541470165895', -0.10438394484995689', -0.00914217572234629', -4.133154510443281'},  
 {0.47987305299196353', -0.22733819613306952', -0.015000617701155461', 1.25780834036857'},  
 {5.894412477880864', -0.3805736476532139', -0.011887356495557236', -4.428034488934852'},  
 {-3.2556510956926226', -0.09418890296872945', 0.002400680544390636', 0.09972134042397435'},  
 {-9.854027530892957', -0.17108771621062685', 0.0031028004461154906', 9.931322779900666'},  
 {-1.3065390737613038', -0.1738569292491596', -0.00371008354130536', 1.2715241365166425'},  
 {0.0924614592893833', -0.16829120246077145', -0.0010431855959568844', -0.5527673007348359'},  
 {0.3980859502475215', -0.151375706390227', -0.002646985875974652', -0.7976765483673897'},  
 {0.10629071964791194', -0.14634126114930335', -0.002507402509479418', -0.476854663941709'},  
 {-0.7351559944712951', -0.12472151195073634', -0.0022224071277419043', 0.49900111911265527'},  
 {-1.6139998499797072', -0.12187604584268359', 0.00006361371996468101', 1.4351148136075338'},  
 {-2.5778968564545215', -0.14455235404334885', 0.0015508528683109185', 2.7229110328685717'},  
 {-0.20699253422157532', -0.20904352204134327', 0.004278399982170455', -0.26860550793165566'},  
 {6.017035186881453', -0.36064396296498874', -0.01759278123792813', -4.736280152604597'},  
 {-2.02162304441456', -0.08961446968087905', 0.006493467338458072', -2.5249175129402497'},  
 {-5.122206620736595', -0.11532169979666868', 0.0011942870548145288', 2.2759606636926883'},  
 {3.1763398663810904', -0.18172068732386054', 0.011681691162432443', -7.265334049998894'},  
 {7.219122363363802', -0.18803436697914028', 0.011134660871288992', -11.31440300631971'},  
 {7.295687154723665', -0.1555664766946561', 0.008952833205172586', -11.24636742907698'}];  
 Es12 = {{3.659054904508988', -0.09435977806591872', -0.012854450158956025', -5.126465365874477'},  
 {3.041676243025657', -0.0790619208478258', -0.013620533866869497', -4.39267403849669'},  
 {1.8712445542715548', -0.06302214738541635', -0.014303474237766881', -2.9339252493449606'},  
 {1.8537474901632767', -0.08234828844023295', -0.010379370717016851', -2.9272150399254495'},  
 {1.7840441409374534', -0.1008210294139387', -0.008197989135117687', -2.7031475656901782'},  
 {-0.7697393661352997', -0.27032763351912914', -0.014732329835294756', 3.4860575190272995'},  
 {4.9649550335860075', -0.39971558343091523', -0.013392540447759834', -2.705997068377896'},  
 {-5.545140460284527', -0.06736074290752608', 0.0011608556223925714', 2.8634036726617538'},  
 {-12.609672677607184', -0.1845792966034557', 0.0012080039222449844', 13.297686243894562'},  
 {-2.921693526720529', -0.21224137643090762', -0.0036445057005906304', 3.349295389372551'},  
 {-0.3673174425129984', -0.2138269798588859', -0.0021805333604986944', 0.3432005693887031'},  
 {-0.01753013903284424', -0.1907816676844511', -0.003852269811081132', 0.03955709027845237'},  
 {-0.2999633187261043', -0.18578127316733653', -0.0036829279692549366', 0.3422649794201706'},  
 {-1.1362986255830632', -0.15972342863429503', -0.0034104152404633116', 1.28304171248883'},  
 {-1.568948920283904', -0.15721516769550467', -0.002218914219823324', 1.7665791028896067'},  
 {-2.15816921143171', -0.18522544452527553', -0.0019834340333311825', 2.717121985028097'},  
 {-1.428649710052351', -0.2501280405074496', -0.0010204342494863111', 2.186722697418564'},  
 {3.9789730235662035', -0.4265066999317244', -0.020536531552467097', -0.8932346301122189'}];

{-1.4545099157730434', -0.1251169946299162', 0.0025398352190401435', -2.1029775802589823'},  
 {-6.86524725045058', -0.10625576917334298', 0.0007326726008042345', 4.347009851731982'},  
 {2.5843910612481924', -0.20074654667318656', 0.01015985080856245', -6.282440259625149'},  
 {9.629547827287416', -0.23251059475070823', 0.01268148844733489', -14.127357844939459'},  
 {7.6484839160066524', -0.19063069286653014', 0.008968448945700026', -11.371697126746408'}];  
 Es13 = {{4.277452396908964', -0.07870996363617122', -0.011753385580270951', -6.132112243220072'},  
 {3.8219945241719255', -0.07091319600160108', -0.012477305573581189', -5.535796522387685'},  
 {2.8724782329092706', -0.06130682499184318', -0.014710777418835799', -4.184637558826297'},  
 {2.514125492761242', -0.06783478436866448', -0.012244420245462571', -3.7417644154209277'},  
 {2.9355471504133397', -0.08976266824467427', -0.009998650376708499', -4.15268174029144'},  
 {1.3535645268997032', -0.17776138227815177', -0.015323440914563991', -0.5358103474038077'},  
 {6.618223025126479', -0.33786821186061455', -0.008756220805321298', -6.3357316520874996'},  
 {-1.6810472004502035', -0.10302911498801523', 0.0013987929171358183', -1.5459878880010134'},  
 {-8.793459844405357', -0.14892270302434638', 0.004934663440169621', 8.45024171362177'},  
 {-0.6444154940850709', -0.14026531110056514', -0.002727368557523183', 0.2775320618964992'},  
 {0.062097713571521045', -0.1287234229869739', 0.00030366498223059697', -0.7724358876173094'},  
 {0.4112076205834367', -0.11196392660842858', -0.00121811955057593', -1.0680642297619307'},  
 {0.11417657975834898', -0.10648525070428348', -0.0011958609596571517', -0.7255149150579338'},  
 {-0.7166071043091872', -0.08825352327282626', -0.0009591953096396368', 0.26277628828081506'},  
 {-1.6163320576208378', -0.0880357465684511', 0.0010848480025120568', 1.2570533435626152'},  
 {-2.28120273971899', -0.11225082855633418', 0.002332066577854049', 2.195688416624886'},  
 {1.2287790921117419', -0.171596519595238', 0.005571601707305694', -2.4711843652558225'},  
 {8.864220467308396', -0.29463994196729426', -0.011616738016042466', -9.95744767725282'},  
 {1.7409304478759173', -0.09969976865521178', 0.008714631968673234', -7.260706107582489'},  
 {-3.111423316623149', -0.1126222515439441', 0.0027273700824481176', -0.3445845057683117'},  
 {3.3517230178811515', -0.16220887398766898', 0.01172330132340106', -7.596973539019283'},  
 {5.941442298627067', -0.16094535632138612', 0.009499994837497187', -9.694176162594722'},  
 {6.738799498916517', -0.12746801164957813', 0.007484497268149622', -10.54728235298692'}];  
 Es14 = {{4.138381206262848', -0.08329582614621125', -0.012543499711344486', -5.870798644383503'},  
 {3.6638821731844016', -0.07395330557359667', -0.013217823623583015', -5.267502873922596'},  
 {2.731465133942441', -0.06396063028006166', -0.014804480751073476', -3.988292460046113'},  
 {2.4565663678987755', -0.07338981205249165', -0.011934562657877675', -3.6619753208459764'},  
 {2.721673610409863', -0.09391976241348192', -0.009742224565706826', -3.8702311445658903'},  
 {0.626464148141365', -0.20353820468112652', -0.015183517602088251', 0.7870904174928377'},  
 {5.991871959373379', -0.36013280629617267', -0.010417792636657736', -4.993955522832422'},  
 {-2.773528154420251', -0.09526333769440026', 0.0017360928484562933', -0.32267514426823074'},  
 {-9.470786004881175', -0.1573161889005528', 0.0037102328154868763', 9.36897630959587'},  
 {-1.1622535656705761', -0.15579215088079804', -0.00324508406848114', 0.9919864411721122'},  
 {0.00990994097157244', -0.14828017255075357', -0.0006880444428942767', -0.5524247650852017'},  
 {0.33666209644989203', -0.13097339456393978', -0.0022691418391822048', -0.8198679855299729'},  
 {0.03524422783128669', -0.1256663483766611', -0.002165854651033776', -0.48240584400366493'},  
 {-0.8044438112932615', -0.10605618298425255', -0.0018478927774367472', 0.4998722088968928'},  
 {-1.6271698846561857', -0.1054570909173611', 0.00025253121585043324', 1.3925845034457336'},  
 {-2.4116395646371713', -0.13061561426045692', 0.001540555390386067', 2.483933226973901'},  
 {0.4691378621967362', -0.1918168313085718', 0.004484372177957427', -1.2599425835340046'},  
 {7.031820110600259', -0.3362734315437565', -0.014822657757354', -6.629638993499176'},  
 {-0.3190434219648153', -0.09670626220461315', 0.007126837309771833', -4.534836573123322'},  
 {-4.34419733943491', -0.11103387770406989', 0.0020198539271568624', 1.212488738461437'},  
 {3.2285259529711827', -0.1727625085361578', 0.011469225437278139', -7.368943051866102'},  
 {6.597941675969096', -0.17669928962329381', 0.010304491952853868', -10.518897262207954'},  
 {6.9565722592029395', -0.1423176721087122', 0.008153294116658698', -10.8042318265186'}];  
 Es15 = {{4.871933683251892', -0.10557794075922744', -0.012793314366481037', -6.673285381795246'},  
 {4.364169114425135', -0.09458373318261443', -0.013465273643108604', -6.045386138137347'},  
 {3.511719435460646', -0.08509730989776013', -0.014272654698653792', -4.925232504557205'},  
 {3.2086205611740652', -0.09560490798863781', -0.010947884061183306', -4.582140826005783'}];

{3.2892055306319383', -0.11425614290258934', -0.008717565891974137', -4.564585728638897'},  
 {0.5748040952224408', -0.24245017250668968', -0.01485677809255876', 1.2885097442963387'},  
 {6.004226946954772', -0.39440361241205435', -0.012760077721361854', -4.303512401111277'},  
 {-3.18760399690593', -0.09822092778101173', 0.0032329794688152422', -0.12098231984720519'},  
 {-9.968665585333143', -0.18321639560240546', 0.002823310687159845', 10.152480651652748'},  
 {-1.2249163217488057', -0.1871368708600577', -0.004065093845500047', 1.2564591698276781'},  
 {0.2303564258190973', -0.18181680215745874', -0.0011025643906030004', -0.6710067907344717'},  
 {0.505892124675624', -0.16571594616311747', -0.0026919367047675237', -0.8844480771638737'},  
 {0.2247166099861705', -0.16091568822046887', -0.0025419631247805097', -0.5780284367160318'},  
 {-0.6158429838708901', -0.13763471810828487', -0.002316292264464739', 0.39263948018130906'},  
 {-1.5941388778683852', -0.1326230347362031', 0.00024691774900026565', 1.4159700579569559'},  
 {-2.747242016776114', -0.15201121435689047', 0.0019971095617041103', 2.900852042261823'},  
 {-0.6472618274352566', -0.2192190339954596', 0.004604698192500462', 0.31498496732488207'},  
 {5.547814677136509', -0.37078250813814895', -0.019300523528023836', -3.8604812654821328'},  
 {-3.265786062639064', -0.08077542673362632', 0.0065373488548621005', -1.1984980594570493'},  
 {-5.52285207481126', -0.11996521009100618', 0.0005108977097471731', 2.8705254881451925'},  
 {3.1978107545952548', -0.18753831856375378', 0.012114393305163784', -7.292965039230147'},  
 {7.65442679384202', -0.194273172543634', 0.011794816586355778', -11.88920538420945'},  
 {7.61007513650415', -0.16381869782503183', 0.00969789789478836', -11.686280406285666'}];  
 Es16 = {{2.6537293597754132', -0.08405012388058358', -0.01265490330308521', -3.8429863213671385'},  
 {1.9267700990058503', -0.06487927991696521', -0.013455197687581317', -3.008938420997548'},  
 {0.2594673141703837', -0.038665559348986606', -0.014362911916414105', -1.006839011032996'},  
 {0.7655916903687497', -0.07135370675321187', -0.009951478834734285', -1.5917205232941183'},  
 {0.8395921219438163', -0.09501275722399405', -0.0077694086268438', -1.5044826153157296'},  
 {-1.0768025008700066', -0.2974993818334848', -0.014666614583121199', 4.228365203779776'},  
 {4.648095584289175', -0.3963246845124197', -0.013543126803550892', -2.259212736686033'},  
 {-5.964167518856695', -0.06180169506367358', -0.0005650371901972656', 3.686774768452133'},  
 {-15.344010373974475', -0.1909813960417325', -0.00017084007887729024', 16.559022805220454'},  
 {-3.6466700439093955', -0.2520046804478411', -0.003135223965534721', 4.393577019920957'},  
 {-0.383591351796607', -0.262147567438565', -0.0017821014030742388', 0.6340164281452331'},  
 {0.036059848472686416', -0.22959471831234568', -0.0034787252478122753', 0.22860843221768787'},  
 {-0.2531749004874855', -0.22365414673651074', -0.0033372749631923183', 0.5360177608665195'},  
 {-1.135106341499165', -0.19353521837722842', -0.003029303083582734', 1.4991043860662148'},  
 {-1.417213070361462', -0.18929787510697235', -0.002421206271080489', 1.8372801976476998'},  
 {-1.8172246727978463', -0.2166208627834375', -0.0043174491137676334', 2.734455086057325'},  
 {-1.8789985749465452', -0.2805935496453627', -0.006712677132811111', 3.6220787498554223'},  
 {3.201242689498095', -0.4526758094641757', -0.021003234038914853', 0.48845638681928505'},  
 {0.6741917401225646', -0.15840396243944288', 0.0013050163322183925', -3.9651538112490305'},  
 {-6.950580473740632', -0.10307147069482571', 0.001172245800416585', 4.376610453825008'},  
 {2.0733655421357025', -0.21329897470123022', 0.009056130464528656', -5.475924369046228'},  
 {12.916152382053115', -0.2793974009840758', 0.014433144609732095', -17.94586493920608'},  
 {7.956357615949928', -0.22105856039052665', 0.008056423600936096', -11.30223329031789'}];  
 Es17 = {{-5.019121719597795', 0.024772172342692085', 0.003080729651082842', 3.3817948583881323'},  
 {-6.365590601998595', 0.002369288338906992', -0.00001925329262730408', 6.200000424618344'},  
 {1.0220161804990782', -0.10279107190513588', 0.0036200542544557266', -0.9518369990417137'},  
 {1.2853214280736283', -0.1055571210593467', 0.003966499404433437', -1.2326296812385544'},  
 {1.1352079684207543', -0.12277922143540652', 0.0030117573961268265', -0.18036347908963674'},  
 {1.1390549914400119', -0.10795613246330303', 0.004032099663799631', -0.9295427033882285'},  
 {-0.8801788906890027', -0.03591701363902229', 0.001999009172599853', -0.2091980815155924'},  
 {-0.6783464508494848', 0.016847370239231024', 0.00021718727240227072', -1.6579194461311844'},  
 {-4.7562051203299545', 0.10094542123220192', -0.0007116664794906097', 1.1862203444129202'},  
 {-5.648040802241088', 0.09745642105848064', -0.0004817496255743754', 2.3539575022267063'},  
 {-5.492245694984299', 0.09386741057109027', 0.00019743155386386452', 2.1151039281429744'},  
 {-3.6045160417066024', 0.045145606804957196', 0.0006765986894854457', 1.0705118751802756'},  
 {-1.4771623673036813', 0.007925624272250048', 0.0014773356689492642', -0.6934254912213276'},

{1.5566939181198591', -0.02297912625165834', 0.0031754259124747077', -3.944017109243573'},  
 {1.9168551283512536', -0.015537387729474918', 0.0033073445900267443', -4.862898054405561'},  
 {0.5892951784729359', 0.04738784051628985', 0.0029748102294755354', -5.467193402437419'},  
 {-0.6344256692271798', 0.06512519171135023', 0.0024576384281917198', -4.369235810082927'},  
 {1.7900466439785383', -0.005627630831561378', 0.0023353720380426043', -4.820821261867021'},  
 {2.0743645038633605', 0.0336832940463449', 0.00019834671303136444', -5.703536020416088'},  
 {-0.3994338138365181', 0.048055896379218775', -0.0002454332207737434', -2.8190874804514463'},  
 {-2.9591320525211318', 0.03542308247265564', -0.00127465857142252', 1.1409589877272455'},  
 {-2.957585464813942', 0.047790521597396024', -0.001479960376662401', 0.8621030632507286'},  
 {-1.910094636977632', 0.05970185583241539', -0.0004968654438869866', -0.9850687061242013}];  
 Es18 = {{-5.968403483877015', 0.02206400563733288', 0.0031499173261994758', 4.750595912862819'},  
 {-6.174703451557826', -0.004813387901627558', 0.00020295429283041008', 6.165354709036221'},  
 {3.3331912869175437', -0.12068104392186184', 0.004577026658645695', -3.6084782415833745'},  
 {2.907392767738971', -0.1169019070000187', 0.004706507652491154', -3.155432956936419'},  
 {0.9827258141891375', -0.11684131330614266', 0.0028700335906850405', -0.14921163063777326'},  
 {-0.28226869703833407', -0.09887659826196324', 0.003186992211012681', 0.8600653706122543'},  
 {-1.4072061558656312', -0.059056647331247325', 0.0014746415229821377', 1.469073466772488'},  
 {-1.3286784142249104', -0.003810918248563614', 0.00008564998260373866', -0.044059482663096644'},  
 {-5.349870601757787', 0.08831969140452865', -0.0008720305930476367', 2.4342228576035203'},  
 {-6.345918462334507', 0.08521510269381387', -0.0007225559325040918', 3.7560987484779833'},  
 {-6.525863356773333', 0.08764759948697061', -0.00014569965917236098', 3.797588801422541'},  
 {-4.632592907098865', 0.046273472081327455', 0.00034766226189228536', 2.4928730971750857'},  
 {-1.9509229328378248', 0.006301762619873766', 0.0011485101208420477', 0.05673035511863669'},  
 {1.699312990123306', -0.02516939439201328', 0.002951478302334713', -4.03639662682356'},  
 {2.953020188417279', -0.023150146198798963', 0.003494816308257145', -6.03399168358611'},  
 {1.324417939918378', 0.036429164577222305', 0.002981437010875719', -6.056827986934563'},  
 {0.5149294139554875', 0.04399774581263784', 0.002424726146948818', -5.119584448904645'},  
 {3.0353004249694044', -0.03669115649980367', 0.0018650881188654923', -5.232756382063689'},  
 {3.3913426830254547', 0.019165789131700077', -0.00017788668762940975', -6.832370307232855'},  
 {0.5949013045286885', 0.041299871775683825', -0.0008942866917220193', -3.7154579011933153'},  
 {-2.3177500452784088', 0.029115845453717776', -0.001400934295884264', 0.5194165201837867'},  
 {-2.5167934276426926', 0.03746160166475701', -0.001639747894683668', 0.6168699760362695'},  
 {-1.5057573106985456', 0.0500024381320744', -0.0007284724404940961', -1.1964143479512417}];  
 Es19 = {{-6.973291008879074', 0.029612960937967638', 0.002798534291054635', 5.92581449913463'},  
 {-7.7451021231519155', 0.004973627507715593', -0.00017992020561087349', 8.034956289099911'},  
 {0.8210833991189236', -0.10813580412200603', 0.0035939302600825618', -0.47106383310698663'},  
 {0.5929297230880414', -0.1044560633199339', 0.003770086026898858', -0.2877345442052154'},  
 {-0.25871514405957347', -0.11778291392829995', 0.002390497908405656', 1.665363533368099'},  
 {-0.8258853443349135', -0.10826261088954173', 0.0032216285988051663', 1.9127773661368017'},  
 {-1.5530574481889552', -0.09237162924172103', 0.001480512082179504', 2.846280630677839'},  
 {-1.7515427395167027', -0.031558953605926816', 0.0000942207605938104', 1.476207514203275'},  
 {-5.975391521451722', 0.08358045605500364', -0.0009421008955015548', 3.4728396252576745'},  
 {-6.808371925388668', 0.08586170813212907', -0.0008305158852621517', 4.4303768447456635'},  
 {-7.060992769538313', 0.08724821283738539', -0.00030188429419515607', 4.611528215251013'},  
 {-5.365989562901412', 0.04296527099102351', 0.00014274352859011547', 3.691751350444461'},  
 {-2.345567639474604', -0.00830912499449923', 0.0010632766710766178', 1.1551091765407249'},  
 {0.5589193964903251', -0.03666394021032607', 0.002240161872032003', -1.972611140449185'},  
 {1.5574742017528316', -0.034568838168476876', 0.0024758818863727192', -3.571819659227404'},  
 {0.8236087251148828', 0.014465149140698342', 0.002512637984448265', -4.532690125857384'},  
 {-0.3269184412485554', 0.024627604050726754', 0.001975451774926682', -3.268169203750694'},  
 {1.8297409507167506', -0.045083205934217954', 0.0018680983462894282', -3.4347063691083743'},  
 {2.0290965507083576', 0.002041178116627876', 0.00005589864665924219', -4.592617739316233'},  
 {-0.9607355321493912', 0.03961869640551629', -0.0006830252816315433', -1.7535313772858372'},  
 {-3.5913652726156244', 0.027635401895998373', -0.0015794525341513246', 2.243332276099856'},  
 {-3.32862651358546', 0.04927079904031526', -0.0018578006875273093', 1.3744054108441208'},

$\{-2.2181462323085377', 0.06505616712110508', -0.0008025653730298377', -0.6893495709011095'\}$ ;  
 Es20 =  $\{-8.571052210119332', 0.12983996876762782', 0.0007955927124505584', 4.883119727692465'\}$ ,  
 $\{-8.91702555269611', 0.0818873829551222', -0.0006431703931035728', 7.004767769632494'\}$ ,  
 $\{-5.8352302736551485', -0.0029620658433763287', 0.000756734942607326', 5.29953247628682'\}$ ,  
 $\{-5.465930826186013', 0.006264408191687319', 0.0010538611289741804', 4.432116099676048'\}$ ,  
 $\{-2.1768346278261017', -0.04369836288000274', 0.0021858955190031796', 1.613392924469569'\}$ ,  
 $\{1.1331666583004494', -0.025744750428105', 0.006006044503053832', -4.4143569029033705'\}$ ,  
 $\{-5.6965539397955265', 0.1864238204286457', 0.0031790332825644718', -2.228534578428679'\}$ ,  
 $\{-2.1600780169611054', 0.1358398839819075', -0.0003181952286018502', -3.7519423346332026'\}$ ,  
 $\{-5.884002490888868', 0.194741097973631', 0.00030036506329120244', -0.7804152085815941'\}$ ,  
 $\{-6.45315094060076', 0.20467620313264176', 0.0006535351511033569', -0.506336784166596'\}$ ,  
 $\{-5.983607502853691', 0.193690370577835', 0.0013516349395335885', -0.9303517366453808'\}$ ,  
 $\{-3.5455215915652047', 0.10998132016348933', 0.001958129741002991', -1.4981696108309281'\}$ ,  
 $\{-1.9556638027841489', 0.07171367301253978', 0.00278858864286538', -2.4776453251301036'\}$ ,  
 $\{-0.8902286114155044', 0.05609847724085163', 0.0035740929482352313', -3.4727803740883347'\}$ ,  
 $\{-2.9408367245629', 0.08888556228882245', 0.0027233477621261574', -1.9601245600019983'\}$ ,  
 $\{-8.265675447185824', 0.2903715203906545', 0.002661612500247019', -2.492499964727485'\}$ ,  
 $\{-12.550453088796258', 0.38868429623075035', 0.002963616726839581', -0.5860426063826001'\}$ ,  
 $\{-10.270570803922396', 0.34314838972156986', 0.00489849647225675', -2.240346792688579'\}$ ,  
 $\{-6.109293070094556', 0.2630536045508453', 0.002961338686692385', -3.8006598552438113'\}$ ,  
 $\{-3.8939555954130736', 0.154741948779493', 0.002885972269117779', -2.7327764757012116'\}$ ,  
 $\{-5.138551685906231', 0.10589067499393054', -0.0005561857418745656', 1.586716992017165'\}$ ,  
 $\{-4.893439726186266', 0.14090051960178052', -0.0007048576696723328', 0.33429744417384194'\}$ ,  
 $\{-3.749049870376697', 0.13708900183739453', 0.00040277774268004094', -1.1611788024486631'\}$ };  
 Es21 =  $\{-4.309899060230262', 0.01503223983576925', 0.0034516015139100602', 2.6888586807515846'\}$ ,  
 $\{-5.191146631476554', -0.008277725936715871', 0.0003059795151474762', 4.917861794719721'\}$ ,  
 $\{3.4755889073588553', -0.11945193979011895', 0.0046133426413245224', -3.855073854751909'\}$ ,  
 $\{3.41556922839607', -0.12068655275304022', 0.004859902654483811', -3.741277305575603'\}$ ,  
 $\{2.032538361487651', -0.12429796049408041', 0.0033053511752958167', -1.3975438832640854'\}$ ,  
 $\{1.168737376528506', -0.10365982510953921', 0.003742005587233266', -1.0478046331983442'\}$ ,  
 $\{-0.7492502777892909', -0.03161967802228992', 0.001816402635027373', -0.4830431580410579'\}$ ,  
 $\{-0.5412470225037082', 0.019992604193499408', 0.000208971257197227', -1.9512017682444698'\}$ ,  
 $\{-4.410397420461803', 0.09602367008523836', -0.0007245950903331834', 0.8770245658663505'\}$ ,  
 $\{-5.425418692206539', 0.08971814649697699', -0.0004937834603506429', 2.291101954306322'\}$ ,  
 $\{-5.316975821058165', 0.08847246765042963', 0.0001771931218882015', 2.042941150843896'\}$ ,  
 $\{-3.3282854989923494', 0.043971211468836806', 0.0006732138319354553', 0.7098973886593725'\}$ ,  
 $\{-1.268521805211079', 0.01322797505366905', 0.001398656999984533', -1.166426396646303'\}$ ,  
 $\{2.386900252373767', -0.019891459192490437', 0.003499767038384131', -5.229638275865717'\}$ ,  
 $\{3.149675805185863', -0.014199653934441791', 0.003908333358288664', -6.677203060606489'\}$ ,  
 $\{1.3115450642508786', 0.05127144492443647', 0.003226885647163892', -6.603192998734945'\}$ ,  
 $\{0.44701923185116405', 0.06302219704266278', 0.0026643467144346444', -5.735560476811174'\}$ ,  
 $\{3.0877631938285557', -0.017141655848839657', 0.0021576262057638996', -6.029776227272726'\}$ ,  
 $\{3.4006847657865276', 0.03261616690082558', -0.00012136507486207066', -7.284086980149651'\}$ ,  
 $\{0.8697553638493647', 0.04368466149704865', -0.0006455548952952704', -4.18782719636406'\}$ ,  
 $\{-1.946058072016888', 0.031828774909355845', -0.0012237308281768308', -0.0712573671151994'\}$ ,  
 $\{-2.224295338223753', 0.0362052027914455', -0.0013996688189846659', 0.22624066276427204'\}$ ,  
 $\{-1.2637523933103358', 0.046332386855476033', -0.0005274163866649316', -1.438825665041676'\}$ };  
 Es22 =  $\{-3.997786123134445', 0.11039916811847628', 0.0019917426336525015', -0.8224976029666095'\}$ ,  
 $\{-4.7634343942654045', 0.060111670121858495', -0.000010305712534249804', 1.999129579464737'\}$ ,  
 $\{-1.2194502344239293', -0.018357996970991733', 0.0018393574257492631', -0.602610764271614'\}$ ,  
 $\{-0.6833029617369885', -0.010385967391941506', 0.002315345170441465', -1.678609970574118'\}$ ,  
 $\{2.6653077050609975', -0.06597258904996056', 0.0037786156959906426', -4.479529198458175'\}$ ,  
 $\{6.201736942953636', -0.07126677897513951', 0.007496503525012565', -9.949509019648941'\}$ ,  
 $\{-3.6736373352084652', 0.23511331848097786', 0.003812554508742388', -6.880856072644585'\}$ ,  
 $\{-0.2553146056048227', 0.18920530441763164', 0.00030050423571314876', -8.369411019690434'\}$ ,

```
{-3.3791558241288295`, 0.21688308656753139`, 0.00033566601766804165`, -4.942846566268658`},
{-3.94916618301819`, 0.216456094268072`, 0.0010009021756775158`, -4.442651171066261`},
{-3.1988409710485852`, 0.20378615244930662`, 0.001926504068500745`, -5.2295412116700986`},
{-0.9046305362573286`, 0.12593164728684034`, 0.002585206025511056`, -5.840687643383652`},
{0.4355389590326045`, 0.10606418802322451`, 0.0035042524364625213`, -7.104213000030648`},
{2.598295664538044`, 0.07947533841418712`, 0.00504465922347779`, -9.27412987401785`},
{0.16891273411552435`, 0.12335552908379044`, 0.004595531877082297`, -7.736396780143838`},
{-5.580048938331185`, 0.3246393193595847`, 0.0041001229937584985`, -7.579647107526696`},
{-9.462648664668567`, 0.42072945591414934`, 0.00439013686851294`, -6.041595435271445`},
{-6.692951814087483`, 0.3656089523580108`, 0.005783934027116653`, -7.823611075032799`},
{-2.62051656266946`, 0.28882096303498234`, 0.0034130421046365293`, -9.283867558141914`},
{0.44041204709435106`, 0.14914065645287436`, 0.003675770072216563`, -8.361721343387105`},
{-1.4048813702996714`, 0.1081778869845482`, -0.00019089467660534867`, -3.4178469553186552`},
{-1.6094051797216509`, 0.1303055515973871`, -0.0002352146253466577`, -3.7805435564877965`},
{-0.5751591894605862`, 0.11534409582823091`, 0.0009090295646993716`, -4.818900882849865`};
```

We can draw the graph to see how does the coefficient of these 22 countries change from Jan-2012 to Dec-2013

(\*For temperature\*)

```
Plot[{RefineEs[x, 2, 4, {1, 2, 3, 4, 5, 6, 7, 8, 9, 11, 12, 13, 14, 15, 16, 17, 18, 19, 20, 21, 22, 23, 24}, Es1][[2]],
  RefineEs[x, 2, 4, {1, 2, 3, 4, 5, 6, 7, 8, 9, 11, 12, 13, 14, 15, 16, 17, 18, 19, 20, 21, 22, 23, 24}, Es2][[2]],
  RefineEs[x, 2, 4, {1, 2, 3, 4, 5, 6, 7, 8, 9, 11, 12, 13, 14, 15, 16, 17, 18, 19, 20, 21, 22, 23, 24}, Es3][[2]],
  RefineEs[x, 2, 4, {1, 2, 3, 4, 5, 6, 7, 8, 9, 11, 12, 13, 14, 15, 16, 17, 18, 19, 20, 21, 22, 23, 24}, Es4][[2]],
  RefineEs[x, 2, 4, {1, 2, 3, 4, 5, 6, 7, 8, 9, 11, 12, 13, 14, 15, 16, 17, 18, 19, 20, 21, 22, 23, 24}, Es5][[2]],
  RefineEs[x, 2, 4, {1, 2, 3, 4, 5, 6, 7, 8, 9, 11, 12, 13, 14, 15, 16, 17, 18, 19, 20, 21, 22, 23, 24}, Es6][[2]],
  RefineEs[x, 2, 4, {1, 2, 3, 4, 5, 6, 7, 8, 9, 11, 12, 13, 14, 15, 16, 17, 18, 19, 20, 21, 22, 23, 24}, Es7][[2]],
  RefineEs[x, 2, 4, {1, 2, 3, 4, 5, 6, 7, 8, 9, 11, 12, 13, 14, 15, 16, 17, 18, 19, 20, 21, 22, 23, 24}, Es8][[2]],
  RefineEs[x, 2, 4, {1, 2, 3, 4, 5, 6, 7, 8, 9, 11, 12, 13, 14, 15, 16, 17, 18, 19, 20, 21, 22, 23, 24}, Es9][[2]],
  RefineEs[x, 2, 4, {1, 2, 3, 4, 5, 6, 7, 8, 9, 11, 12, 13, 14, 15, 16, 17, 18, 19, 20, 21, 22, 23, 24}, Es10][[2]],
  RefineEs[x, 2, 4, {1, 2, 3, 4, 5, 6, 7, 8, 9, 11, 12, 13, 14, 15, 16, 17, 18, 19, 20, 21, 22, 23, 24}, Es11][[2]],
  RefineEs[x, 2, 4, {1, 2, 3, 4, 5, 6, 7, 8, 9, 11, 12, 13, 14, 15, 16, 17, 18, 19, 20, 21, 22, 23, 24}, Es12][[2]],
  RefineEs[x, 2, 4, {1, 2, 3, 4, 5, 6, 7, 8, 9, 11, 12, 13, 14, 15, 16, 17, 18, 19, 20, 21, 22, 23, 24}, Es13][[2]],
  RefineEs[x, 2, 4, {1, 2, 3, 4, 5, 6, 7, 8, 9, 11, 12, 13, 14, 15, 16, 17, 18, 19, 20, 21, 22, 23, 24}, Es14][[2]],
  RefineEs[x, 2, 4, {1, 2, 3, 4, 5, 6, 7, 8, 9, 11, 12, 13, 14, 15, 16, 17, 18, 19, 20, 21, 22, 23, 24}, Es15][[2]],
  RefineEs[x, 2, 4, {1, 2, 3, 4, 5, 6, 7, 8, 9, 11, 12, 13, 14, 15, 16, 17, 18, 19, 20, 21, 22, 23, 24}, Es16][[2]],
  RefineEs[x, 2, 3, {1, 2, 3, 4, 5, 6, 7, 8, 9, 11, 12, 13, 14, 15, 16, 17, 18, 19, 20, 21, 22, 23, 24}, Es17][[2]],
  RefineEs[x, 2, 3, {1, 2, 3, 4, 5, 6, 7, 8, 9, 11, 12, 13, 14, 15, 16, 17, 18, 19, 20, 21, 22, 23, 24}, Es18][[2]],
  RefineEs[x, 2, 3, {1, 2, 3, 4, 5, 6, 7, 8, 9, 11, 12, 13, 14, 15, 16, 17, 18, 19, 20, 21, 22, 23, 24}, Es19][[2]],
  RefineEs[x, 2, 3, {1, 2, 3, 4, 5, 6, 7, 8, 9, 11, 12, 13, 14, 15, 16, 17, 18, 19, 20, 21, 22, 23, 24}, Es20][[2]],
  RefineEs[x, 2, 3, {1, 2, 3, 4, 5, 6, 7, 8, 9, 11, 12, 13, 14, 15, 16, 17, 18, 19, 20, 21, 22, 23, 24}, Es21][[2]],
  RefineEs[x, 2, 3, {1, 2, 3, 4, 5, 6, 7, 8, 9, 11, 12, 13, 14, 15, 16, 17, 18, 19, 20, 21, 22, 23, 24}, Es22][[2]]],
{x, 1, 24}, AxesLabel → {"Month Since 2012", Beta}, ImageSize → Large,
Exclusions → {1, 2, 3, 4, 5, 6, 7, 8, 9, 10, 11, 12, 13, 14, 15, 16, 17, 18, 19, 20, 21, 22, 23, 24},
PlotLabels → {"Slovenia", "Slovakia", "Poland", "Austria", "Belgium", "Bosnia and Herzegovina",
  "Germany", "France", "Netherlands", "Czech Republic", "Croatia", "Luxembourg", "Romania", "Hungary",
  "Italy", "United Kingdom", "Cambodia", "Laos", "Thailand", "Singapore", "Vietnam", "Malaysia"},
PlotLegends → {"Slovenia", "Slovakia", "Poland", "Austria", "Belgium", "Bosnia and Herzegovina", "Germany",
  "France", "Netherlands", "Czech Republic", "Croatia", "Luxembourg", "Romania", "Hungary",
  "Italy", "United Kingdom", "Cambodia", "Laos", "Thailand", "Singapore", "Vietnam", "Malaysia"},
PlotStyle → {ColorData["Rainbow"][0.04], ColorData["Rainbow"][0.09], ColorData["Rainbow"][0.14],
  ColorData["Rainbow"][0.19], ColorData["Rainbow"][0.24], ColorData["Rainbow"][0.29],
  ColorData["Rainbow"][0.34], ColorData["Rainbow"][0.39], ColorData["Rainbow"][0.44], ColorData["Rainbow"][0.49],
  ColorData["Rainbow"][0.54], ColorData["Rainbow"][0.59], ColorData["Rainbow"][0.64], ColorData["Rainbow"][0.69],
  ColorData["Rainbow"][0.74], ColorData["Rainbow"][0.79], ColorData["Rainbow"][0.84], ColorData["Rainbow"][0.89],
  ColorData["Rainbow"][0.76], ColorData["Rainbow"][0.8], ColorData["Rainbow"][0.94], ColorData["Rainbow"][0.99]}];
```

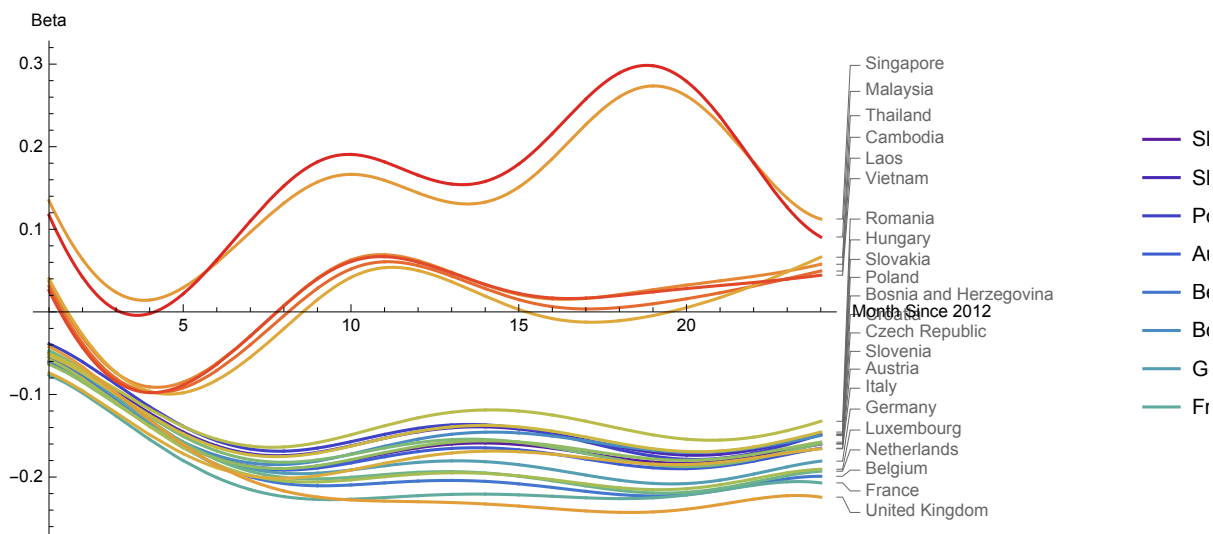

(\*For precipitation\*)

```
Plot[{RefineEs[x, 2, 4, {1, 2, 3, 4, 5, 6, 7, 8, 9, 11, 12, 13, 14, 15, 16, 17, 18, 19, 20, 21, 22, 23, 24}, Es1][[3]],
  RefineEs[x, 2, 4, {1, 2, 3, 4, 5, 6, 7, 8, 9, 11, 12, 13, 14, 15, 16, 17, 18, 19, 20, 21, 22, 23, 24}, Es2][[3]],
  RefineEs[x, 2, 4, {1, 2, 3, 4, 5, 6, 7, 8, 9, 11, 12, 13, 14, 15, 16, 17, 18, 19, 20, 21, 22, 23, 24}, Es3][[3]],
  RefineEs[x, 2, 4, {1, 2, 3, 4, 5, 6, 7, 8, 9, 11, 12, 13, 14, 15, 16, 17, 18, 19, 20, 21, 22, 23, 24}, Es4][[3]],
  RefineEs[x, 2, 4, {1, 2, 3, 4, 5, 6, 7, 8, 9, 11, 12, 13, 14, 15, 16, 17, 18, 19, 20, 21, 22, 23, 24}, Es5][[3]],
  RefineEs[x, 2, 4, {1, 2, 3, 4, 5, 6, 7, 8, 9, 11, 12, 13, 14, 15, 16, 17, 18, 19, 20, 21, 22, 23, 24}, Es6][[3]],
  RefineEs[x, 2, 4, {1, 2, 3, 4, 5, 6, 7, 8, 9, 11, 12, 13, 14, 15, 16, 17, 18, 19, 20, 21, 22, 23, 24}, Es7][[3]],
  RefineEs[x, 2, 4, {1, 2, 3, 4, 5, 6, 7, 8, 9, 11, 12, 13, 14, 15, 16, 17, 18, 19, 20, 21, 22, 23, 24}, Es8][[3]],
  RefineEs[x, 2, 4, {1, 2, 3, 4, 5, 6, 7, 8, 9, 11, 12, 13, 14, 15, 16, 17, 18, 19, 20, 21, 22, 23, 24}, Es9][[3]],
  RefineEs[x, 2, 4, {1, 2, 3, 4, 5, 6, 7, 8, 9, 11, 12, 13, 14, 15, 16, 17, 18, 19, 20, 21, 22, 23, 24}, Es10][[3]],
  RefineEs[x, 2, 4, {1, 2, 3, 4, 5, 6, 7, 8, 9, 11, 12, 13, 14, 15, 16, 17, 18, 19, 20, 21, 22, 23, 24}, Es11][[3]],
  RefineEs[x, 2, 4, {1, 2, 3, 4, 5, 6, 7, 8, 9, 11, 12, 13, 14, 15, 16, 17, 18, 19, 20, 21, 22, 23, 24}, Es12][[3]],
  RefineEs[x, 2, 4, {1, 2, 3, 4, 5, 6, 7, 8, 9, 11, 12, 13, 14, 15, 16, 17, 18, 19, 20, 21, 22, 23, 24}, Es13][[3]],
  RefineEs[x, 2, 4, {1, 2, 3, 4, 5, 6, 7, 8, 9, 11, 12, 13, 14, 15, 16, 17, 18, 19, 20, 21, 22, 23, 24}, Es14][[3]],
  RefineEs[x, 2, 4, {1, 2, 3, 4, 5, 6, 7, 8, 9, 11, 12, 13, 14, 15, 16, 17, 18, 19, 20, 21, 22, 23, 24}, Es15][[3]],
  RefineEs[x, 2, 4, {1, 2, 3, 4, 5, 6, 7, 8, 9, 11, 12, 13, 14, 15, 16, 17, 18, 19, 20, 21, 22, 23, 24}, Es16][[3]],
  RefineEs[x, 2, 3, {1, 2, 3, 4, 5, 6, 7, 8, 9, 11, 12, 13, 14, 15, 16, 17, 18, 19, 20, 21, 22, 23, 24}, Es17][[3]],
  RefineEs[x, 2, 3, {1, 2, 3, 4, 5, 6, 7, 8, 9, 11, 12, 13, 14, 15, 16, 17, 18, 19, 20, 21, 22, 23, 24}, Es18][[3]],
  RefineEs[x, 2, 3, {1, 2, 3, 4, 5, 6, 7, 8, 9, 11, 12, 13, 14, 15, 16, 17, 18, 19, 20, 21, 22, 23, 24}, Es19][[3]],
  RefineEs[x, 2, 3, {1, 2, 3, 4, 5, 6, 7, 8, 9, 11, 12, 13, 14, 15, 16, 17, 18, 19, 20, 21, 22, 23, 24}, Es20][[3]],
  RefineEs[x, 2, 3, {1, 2, 3, 4, 5, 6, 7, 8, 9, 11, 12, 13, 14, 15, 16, 17, 18, 19, 20, 21, 22, 23, 24}, Es21][[3]],
  RefineEs[x, 2, 3, {1, 2, 3, 4, 5, 6, 7, 8, 9, 11, 12, 13, 14, 15, 16, 17, 18, 19, 20, 21, 22, 23, 24}, Es22][[3]]],
{x, 1, 24}, AxesLabel -> {"Month Since 2012", Beta}, ImageSize -> Large,
Exclusions -> {1, 2, 3, 4, 5, 6, 7, 8, 9, 10, 11, 12, 13, 14, 15, 16, 17, 18, 19, 20, 21, 22, 23, 24},
PlotLabels -> {"Slovenia", "Slovakia", "Poland", "Austria", "Belgium", "Bosnia and Herzegovina",
  "Germany", "France", "Netherlands", "Czech Republic", "Croatia", "Luxembourg", "Romania", "Hungary",
  "Italy", "United Kingdom", "Cambodia", "Laos", "Thailand", "Singapore", "Vietnam", "Malaysia"},
PlotLegends -> {"Slovenia", "Slovakia", "Poland", "Austria", "Belgium", "Bosnia and Herzegovina", "Germany",
  "France", "Netherlands", "Czech Republic", "Croatia", "Luxembourg", "Romania", "Hungary",
  "Italy", "United Kingdom", "Cambodia", "Laos", "Thailand", "Singapore", "Vietnam", "Malaysia"},
PlotStyle -> {ColorData["Rainbow"][0.04], ColorData["Rainbow"][0.09], ColorData["Rainbow"][0.14],
  ColorData["Rainbow"][0.19], ColorData["Rainbow"][0.24], ColorData["Rainbow"][0.29],
  ColorData["Rainbow"][0.34], ColorData["Rainbow"][0.39], ColorData["Rainbow"][0.44], ColorData["Rainbow"][0.49],
  ColorData["Rainbow"][0.54], ColorData["Rainbow"][0.59], ColorData["Rainbow"][0.64], ColorData["Rainbow"][0.69],
  ColorData["Rainbow"][0.74], ColorData["Rainbow"][0.79], ColorData["Rainbow"][0.84], ColorData["Rainbow"][0.89],
  ColorData["Rainbow"][0.76], ColorData["Rainbow"][0.8], ColorData["Rainbow"][0.94], ColorData["Rainbow"][0.99]}
```

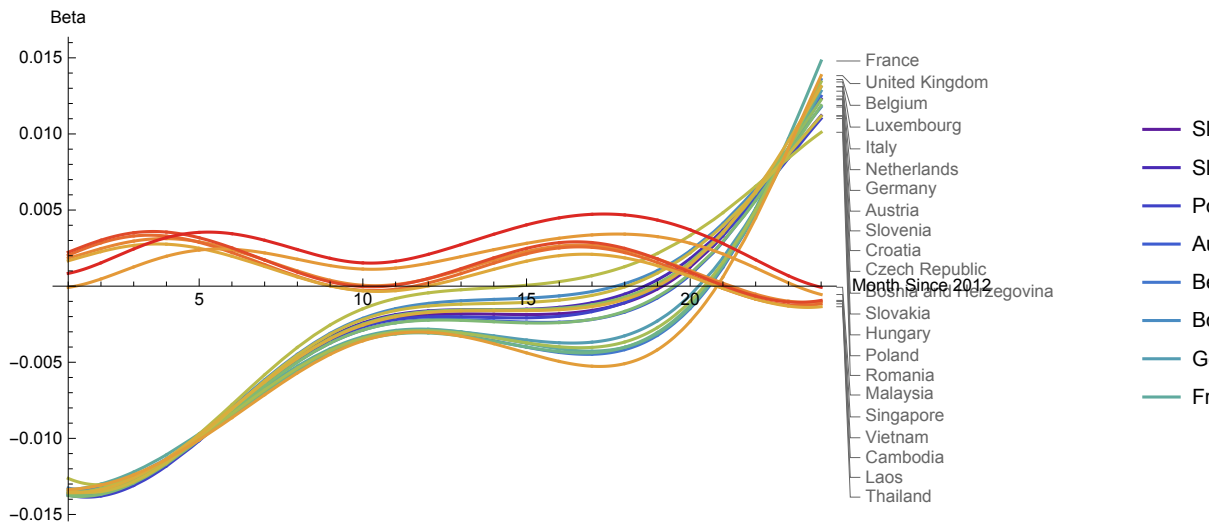



(\*For RH\*)

```

Plot[{RefineEs[x, 2, 4, {1, 2, 3, 4, 5, 6, 7, 8, 9, 11, 12, 13, 14, 15, 16, 17, 18, 19, 20, 21, 22, 23, 24}, Es1][[4]],
  RefineEs[x, 2, 4, {1, 2, 3, 4, 5, 6, 7, 8, 9, 11, 12, 13, 14, 15, 16, 17, 18, 19, 20, 21, 22, 23, 24}, Es2][[4]],
  RefineEs[x, 2, 4, {1, 2, 3, 4, 5, 6, 7, 8, 9, 11, 12, 13, 14, 15, 16, 17, 18, 19, 20, 21, 22, 23, 24}, Es3][[4]],
  RefineEs[x, 2, 4, {1, 2, 3, 4, 5, 6, 7, 8, 9, 11, 12, 13, 14, 15, 16, 17, 18, 19, 20, 21, 22, 23, 24}, Es4][[4]],
  RefineEs[x, 2, 4, {1, 2, 3, 4, 5, 6, 7, 8, 9, 11, 12, 13, 14, 15, 16, 17, 18, 19, 20, 21, 22, 23, 24}, Es5][[4]],
  RefineEs[x, 2, 4, {1, 2, 3, 4, 5, 6, 7, 8, 9, 11, 12, 13, 14, 15, 16, 17, 18, 19, 20, 21, 22, 23, 24}, Es6][[4]],
  RefineEs[x, 2, 4, {1, 2, 3, 4, 5, 6, 7, 8, 9, 11, 12, 13, 14, 15, 16, 17, 18, 19, 20, 21, 22, 23, 24}, Es7][[4]],
  RefineEs[x, 2, 4, {1, 2, 3, 4, 5, 6, 7, 8, 9, 11, 12, 13, 14, 15, 16, 17, 18, 19, 20, 21, 22, 23, 24}, Es8][[4]],
  RefineEs[x, 2, 4, {1, 2, 3, 4, 5, 6, 7, 8, 9, 11, 12, 13, 14, 15, 16, 17, 18, 19, 20, 21, 22, 23, 24}, Es9][[4]],
  RefineEs[x, 2, 4, {1, 2, 3, 4, 5, 6, 7, 8, 9, 11, 12, 13, 14, 15, 16, 17, 18, 19, 20, 21, 22, 23, 24}, Es10][[4]],
  RefineEs[x, 2, 4, {1, 2, 3, 4, 5, 6, 7, 8, 9, 11, 12, 13, 14, 15, 16, 17, 18, 19, 20, 21, 22, 23, 24}, Es11][[4]],
  RefineEs[x, 2, 4, {1, 2, 3, 4, 5, 6, 7, 8, 9, 11, 12, 13, 14, 15, 16, 17, 18, 19, 20, 21, 22, 23, 24}, Es12][[4]],
  RefineEs[x, 2, 4, {1, 2, 3, 4, 5, 6, 7, 8, 9, 11, 12, 13, 14, 15, 16, 17, 18, 19, 20, 21, 22, 23, 24}, Es13][[4]],
  RefineEs[x, 2, 4, {1, 2, 3, 4, 5, 6, 7, 8, 9, 11, 12, 13, 14, 15, 16, 17, 18, 19, 20, 21, 22, 23, 24}, Es14][[4]],
  RefineEs[x, 2, 4, {1, 2, 3, 4, 5, 6, 7, 8, 9, 11, 12, 13, 14, 15, 16, 17, 18, 19, 20, 21, 22, 23, 24}, Es15][[4]],
  RefineEs[x, 2, 4, {1, 2, 3, 4, 5, 6, 7, 8, 9, 11, 12, 13, 14, 15, 16, 17, 18, 19, 20, 21, 22, 23, 24}, Es16][[4]],
  RefineEs[x, 2, 3, {1, 2, 3, 4, 5, 6, 7, 8, 9, 11, 12, 13, 14, 15, 16, 17, 18, 19, 20, 21, 22, 23, 24}, Es17][[4]],
  RefineEs[x, 2, 3, {1, 2, 3, 4, 5, 6, 7, 8, 9, 11, 12, 13, 14, 15, 16, 17, 18, 19, 20, 21, 22, 23, 24}, Es18][[4]],
  RefineEs[x, 2, 3, {1, 2, 3, 4, 5, 6, 7, 8, 9, 11, 12, 13, 14, 15, 16, 17, 18, 19, 20, 21, 22, 23, 24}, Es19][[4]],
  RefineEs[x, 2, 3, {1, 2, 3, 4, 5, 6, 7, 8, 9, 11, 12, 13, 14, 15, 16, 17, 18, 19, 20, 21, 22, 23, 24}, Es20][[4]],
  RefineEs[x, 2, 3, {1, 2, 3, 4, 5, 6, 7, 8, 9, 11, 12, 13, 14, 15, 16, 17, 18, 19, 20, 21, 22, 23, 24}, Es21][[4]],
  RefineEs[x, 2, 3, {1, 2, 3, 4, 5, 6, 7, 8, 9, 11, 12, 13, 14, 15, 16, 17, 18, 19, 20, 21, 22, 23, 24}, Es22][[4]]],
{x, 1, 24}, AxesLabel → {"Month Since 2012", Beta}, ImageSize → Large,
Exclusions → {1, 2, 3, 4, 5, 6, 7, 8, 9, 10, 11, 12, 13, 14, 15, 16, 17, 18, 19, 20, 21, 22, 23, 24},
PlotLabels → {"Slovenia", "Slovakia", "Poland", "Austria", "Belgium", "Bosnia and Herzegovina",
  "Germany", "France", "Netherlands", "Czech Republic", "Croatia", "Luxembourg", "Romania", "Hungary",
  "Italy", "United Kingdom", "Cambodia", "Laos", "Thailand", "Singapore", "Vietnam", "Malaysia"},
PlotLegends → {"Slovenia", "Slovakia", "Poland", "Austria", "Belgium", "Bosnia and Herzegovina", "Germany",
  "France", "Netherlands", "Czech Republic", "Croatia", "Luxembourg", "Romania", "Hungary",
  "Italy", "United Kingdom", "Cambodia", "Laos", "Thailand", "Singapore", "Vietnam", "Malaysia"},
PlotStyle → {ColorData["Rainbow"][0.04], ColorData["Rainbow"][0.09], ColorData["Rainbow"][0.14],
  ColorData["Rainbow"][0.19], ColorData["Rainbow"][0.24], ColorData["Rainbow"][0.29],
  ColorData["Rainbow"][0.34], ColorData["Rainbow"][0.39], ColorData["Rainbow"][0.44], ColorData["Rainbow"][0.49],
  ColorData["Rainbow"][0.54], ColorData["Rainbow"][0.59], ColorData["Rainbow"][0.64], ColorData["Rainbow"][0.69],
  ColorData["Rainbow"][0.74], ColorData["Rainbow"][0.79], ColorData["Rainbow"][0.84], ColorData["Rainbow"][0.89],
  ColorData["Rainbow"][0.76], ColorData["Rainbow"][0.8], ColorData["Rainbow"][0.94], ColorData["Rainbow"][0.99]}]

```

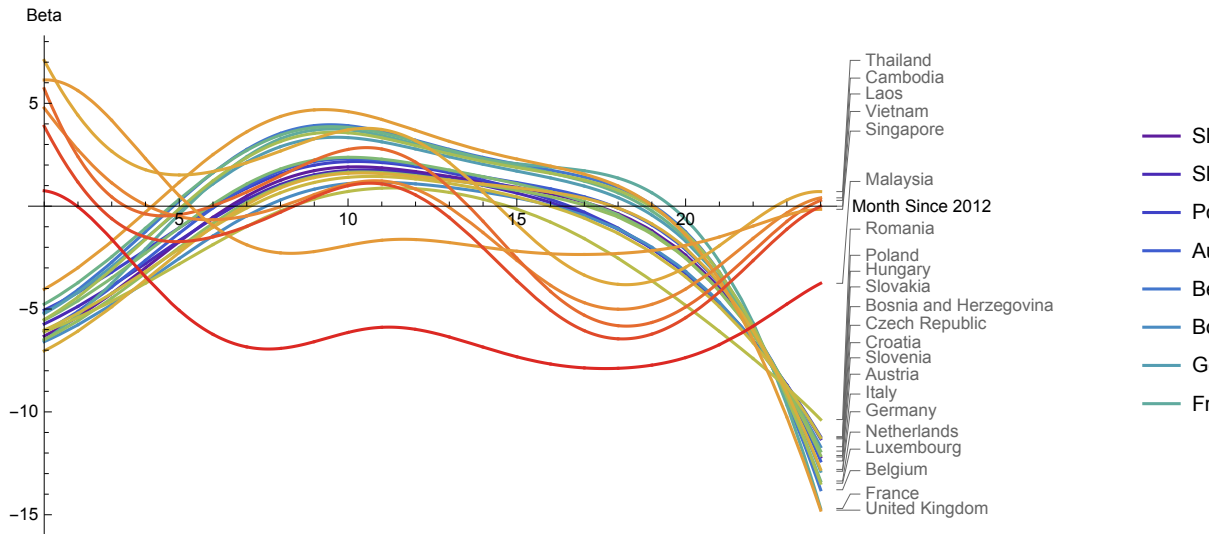

We can also draw the geographical heat map to see the spatial difference of these coefficients  
Please first run the following code

```

TemCoun1[x_] := GeoRegionValuePlot[{{ Slovenia (country) → ColorData["Rainbow"][
  Rescale[RefineEs[x, 2, 4, {1, 2, 3, 4, 5, 6, 7, 8, 9, 11, 12, 13, 14, 15, 16, 17, 18, 19, 20, 21, 22, 23, 24}, Es1][[2]],
  {-0.3, 0.3}, {0, 1}]], Slovakia (country) → ColorData["Rainbow"][
  Rescale[RefineEs[x, 2, 4, {1, 2, 3, 4, 5, 6, 7, 8, 9, 11, 12, 13, 14, 15, 16, 17, 18, 19, 20, 21, 22, 23, 24}, Es2][[2]],
  {-0.3, 0.3}, {0, 1}]], Poland (country) → ColorData["Rainbow"][
  Rescale[RefineEs[x, 2, 4, {1, 2, 3, 4, 5, 6, 7, 8, 9, 11, 12, 13, 14, 15, 16, 17, 18, 19, 20, 21, 22, 23, 24}, Es3][[2]],
  {-0.3, 0.3}, {0, 1}]], Austria (country) → ColorData["Rainbow"][
  Rescale[RefineEs[x, 2, 4, {1, 2, 3, 4, 5, 6, 7, 8, 9, 11, 12, 13, 14, 15, 16, 17, 18, 19, 20, 21, 22, 23, 24}, Es4][[2]],
  {-0.3, 0.3}, {0, 1}]], Belgium (country) → ColorData["Rainbow"]][Rescale[
  RefineEs[x, 2, 4, {1, 2, 3, 4, 5, 6, 7, 8, 9, 11, 12, 13, 14, 15, 16, 17, 18, 19, 20, 21, 22, 23, 24}, Es5][[2]], {-0.3, 0.3}, {0, 1}]],
  Bosnia and Herzegovina (country) → ColorData["Rainbow"]][Rescale[
  RefineEs[x, 2, 4, {1, 2, 3, 4, 5, 6, 7, 8, 9, 11, 12, 13, 14, 15, 16, 17, 18, 19, 20, 21, 22, 23, 24}, Es6][[2]], {-0.3, 0.3}, {0, 1}]],
  Germany (country) → ColorData["Rainbow"]][Rescale[
  RefineEs[x, 2, 4, {1, 2, 3, 4, 5, 6, 7, 8, 9, 11, 12, 13, 14, 15, 16, 17, 18, 19, 20, 21, 22, 23, 24}, Es7][[2]], {-0.3, 0.3}, {0, 1}]],
  France (country) → ColorData["Rainbow"]][Rescale[
  RefineEs[x, 2, 4, {1, 2, 3, 4, 5, 6, 7, 8, 9, 11, 12, 13, 14, 15, 16, 17, 18, 19, 20, 21, 22, 23, 24}, Es8][[2]], {-0.3, 0.3}, {0, 1}]],
  Netherlands (country) → ColorData["Rainbow"]][Rescale[
  RefineEs[x, 2, 4, {1, 2, 3, 4, 5, 6, 7, 8, 9, 11, 12, 13, 14, 15, 16, 17, 18, 19, 20, 21, 22, 23, 24}, Es9][[2]], {-0.3, 0.3}, {0, 1}]],
  Czech Republic (country) → ColorData["Rainbow"]][
  Rescale[RefineEs[x, 2, 4, {1, 2, 3, 4, 5, 6, 7, 8, 9, 11, 12, 13, 14, 15, 16, 17, 18, 19, 20, 21, 22, 23, 24}, Es10][[2]],
  {-0.3, 0.3}, {0, 1}]], Croatia (country) → ColorData["Rainbow"]][
  Rescale[RefineEs[x, 2, 4, {1, 2, 3, 4, 5, 6, 7, 8, 9, 11, 12, 13, 14, 15, 16, 17, 18, 19, 20, 21, 22, 23, 24}, Es11][[2]],
  {-0.3, 0.3}, {0, 1}]], Luxembourg (country) → ColorData["Rainbow"]][
  Rescale[RefineEs[x, 2, 4, {1, 2, 3, 4, 5, 6, 7, 8, 9, 11, 12, 13, 14, 15, 16, 17, 18, 19, 20, 21, 22, 23, 24}, Es12][[2]],
  {-0.3, 0.3}, {0, 1}]], Romania (country) → ColorData["Rainbow"]][
  Rescale[RefineEs[x, 2, 4, {1, 2, 3, 4, 5, 6, 7, 8, 9, 11, 12, 13, 14, 15, 16, 17, 18, 19, 20, 21, 22, 23, 24}, Es13][[2]],
  {-0.3, 0.3}, {0, 1}]], Hungary (country) → ColorData["Rainbow"]][
  Rescale[RefineEs[x, 2, 4, {1, 2, 3, 4, 5, 6, 7, 8, 9, 11, 12, 13, 14, 15, 16, 17, 18, 19, 20, 21, 22, 23, 24}, Es14][[2]],
  {-0.3, 0.3}, {0, 1}]], Italy (country) → ColorData["Rainbow"]][Rescale[
  RefineEs[x, 2, 4, {1, 2, 3, 4, 5, 6, 7, 8, 9, 11, 12, 13, 14, 15, 16, 17, 18, 19, 20, 21, 22, 23, 24}, Es15][[2]], {-0.3, 0.3}, {0, 1}]],
  United Kingdom (country) → ColorData["Rainbow"]][Rescale[RefineEs[x, 2, 4,
    {1, 2, 3, 4, 5, 6, 7, 8, 9, 11, 12, 13, 14, 15, 16, 17, 18, 19, 20, 21, 22, 23, 24}, Es16][[2]], {-0.3, 0.3}, {0, 1}]]}]]
TemCoun2[x_] := GeoRegionValuePlot[{{ Cambodia (country) → ColorData["Rainbow"]][
  Rescale[RefineEs[x, 2, 3, {1, 2, 3, 4, 5, 6, 7, 8, 9, 11, 12, 13, 14, 15, 16, 17, 18, 19, 20, 21, 22, 23, 24}, Es17][[2]],
  {-0.3, 0.3}, {0, 1}]], Laos (country) → ColorData["Rainbow"]][
  Rescale[RefineEs[x, 2, 3, {1, 2, 3, 4, 5, 6, 7, 8, 9, 11, 12, 13, 14, 15, 16, 17, 18, 19, 20, 21, 22, 23, 24}, Es18][[2]],
  {-0.3, 0.3}, {0, 1}]], Thailand (country) → ColorData["Rainbow"]][
  Rescale[RefineEs[x, 2, 3, {1, 2, 3, 4, 5, 6, 7, 8, 9, 11, 12, 13, 14, 15, 16, 17, 18, 19, 20, 21, 22, 23, 24}, Es19][[2]],
  {-0.3, 0.3}, {0, 1}]], Singapore (country) → ColorData["Rainbow"]][

```

```

Rescale[RefineEs[x, 2, 3, {1, 2, 3, 4, 5, 6, 7, 8, 9, 11, 12, 13, 14, 15, 16, 17, 18, 19, 20, 21, 22, 23, 24}, Es20][[2]],
{-0.3, 0.3}, {0, 1}], Vietnam (country) -> ColorData["Rainbow"]][Rescale[
RefineEs[x, 2, 3, {1, 2, 3, 4, 5, 6, 7, 8, 9, 11, 12, 13, 14, 15, 16, 17, 18, 19, 20, 21, 22, 23, 24}, Es21][[2]], {-0.3, 0.3}, {0, 1}],
Malaysia (country) -> ColorData["Rainbow"]][Rescale[RefineEs[x, 2, 3,
{1, 2, 3, 4, 5, 6, 7, 8, 9, 11, 12, 13, 14, 15, 16, 17, 18, 19, 20, 21, 22, 23, 24}, Es22][[2]], {-0.3, 0.3}, {0, 1}]]}
PreC1[x_] := GeoRegionValuePlot[{Slovenia (country) -> ColorData["Rainbow"]][
Rescale[RefineEs[x, 2, 4, {1, 2, 3, 4, 5, 6, 7, 8, 9, 11, 12, 13, 14, 15, 16, 17, 18, 19, 20, 21, 22, 23, 24}, Es1][[3]],
{-0.015, 0.015}, {0, 1}], Slovakia (country) -> ColorData["Rainbow"]][
Rescale[RefineEs[x, 2, 4, {1, 2, 3, 4, 5, 6, 7, 8, 9, 11, 12, 13, 14, 15, 16, 17, 18, 19, 20, 21, 22, 23, 24}, Es2][[3]],
{-0.015, 0.015}, {0, 1}], Poland (country) -> ColorData["Rainbow"]][
Rescale[RefineEs[x, 2, 4, {1, 2, 3, 4, 5, 6, 7, 8, 9, 11, 12, 13, 14, 15, 16, 17, 18, 19, 20, 21, 22, 23, 24}, Es3][[3]],
{-0.015, 0.015}, {0, 1}], Austria (country) -> ColorData["Rainbow"]][
Rescale[RefineEs[x, 2, 4, {1, 2, 3, 4, 5, 6, 7, 8, 9, 11, 12, 13, 14, 15, 16, 17, 18, 19, 20, 21, 22, 23, 24}, Es4][[3]],
{-0.015, 0.015}, {0, 1}], Belgium (country) -> ColorData["Rainbow"]][
Rescale[RefineEs[x, 2, 4, {1, 2, 3, 4, 5, 6, 7, 8, 9, 11, 12, 13, 14, 15, 16, 17, 18, 19, 20, 21, 22, 23, 24}, Es5][[3]],
{-0.015, 0.015}, {0, 1}], Bosnia and Herzegovina (country) -> ColorData["Rainbow"]][
Rescale[RefineEs[x, 2, 4, {1, 2, 3, 4, 5, 6, 7, 8, 9, 11, 12, 13, 14, 15, 16, 17, 18, 19, 20, 21, 22, 23, 24}, Es6][[3]],
{-0.015, 0.015}, {0, 1}], Germany (country) -> ColorData["Rainbow"]][
Rescale[RefineEs[x, 2, 4, {1, 2, 3, 4, 5, 6, 7, 8, 9, 11, 12, 13, 14, 15, 16, 17, 18, 19, 20, 21, 22, 23, 24}, Es7][[3]],
{-0.015, 0.015}, {0, 1}], France (country) -> ColorData["Rainbow"]][
Rescale[RefineEs[x, 2, 4, {1, 2, 3, 4, 5, 6, 7, 8, 9, 11, 12, 13, 14, 15, 16, 17, 18, 19, 20, 21, 22, 23, 24}, Es8][[3]],
{-0.015, 0.015}, {0, 1}], Netherlands (country) -> ColorData["Rainbow"]][
Rescale[RefineEs[x, 2, 4, {1, 2, 3, 4, 5, 6, 7, 8, 9, 11, 12, 13, 14, 15, 16, 17, 18, 19, 20, 21, 22, 23, 24}, Es9][[3]],
{-0.015, 0.015}, {0, 1}], Czech Republic (country) -> ColorData["Rainbow"]][
Rescale[RefineEs[x, 2, 4, {1, 2, 3, 4, 5, 6, 7, 8, 9, 11, 12, 13, 14, 15, 16, 17, 18, 19, 20, 21, 22, 23, 24}, Es10][[3]],
{-0.015, 0.015}, {0, 1}], Croatia (country) -> ColorData["Rainbow"]][
Rescale[RefineEs[x, 2, 4, {1, 2, 3, 4, 5, 6, 7, 8, 9, 11, 12, 13, 14, 15, 16, 17, 18, 19, 20, 21, 22, 23, 24}, Es11][[3]],
{-0.015, 0.015}, {0, 1}], Luxembourg (country) -> ColorData["Rainbow"]][
Rescale[RefineEs[x, 2, 4, {1, 2, 3, 4, 5, 6, 7, 8, 9, 11, 12, 13, 14, 15, 16, 17, 18, 19, 20, 21, 22, 23, 24}, Es12][[3]],
{-0.015, 0.015}, {0, 1}], Romania (country) -> ColorData["Rainbow"]][
Rescale[RefineEs[x, 2, 4, {1, 2, 3, 4, 5, 6, 7, 8, 9, 11, 12, 13, 14, 15, 16, 17, 18, 19, 20, 21, 22, 23, 24}, Es13][[3]],
{-0.015, 0.015}, {0, 1}], Hungary (country) -> ColorData["Rainbow"]][
Rescale[RefineEs[x, 2, 4, {1, 2, 3, 4, 5, 6, 7, 8, 9, 11, 12, 13, 14, 15, 16, 17, 18, 19, 20, 21, 22, 23, 24}, Es14][[3]],
{-0.015, 0.015}, {0, 1}], Italy (country) -> ColorData["Rainbow"]][
Rescale[RefineEs[x, 2, 4, {1, 2, 3, 4, 5, 6, 7, 8, 9, 11, 12, 13, 14, 15, 16, 17, 18, 19, 20, 21, 22, 23, 24}, Es15][[3]],
{-0.015, 0.015}, {0, 1}], United Kingdom (country) -> ColorData["Rainbow"]][
Rescale[RefineEs[x, 2, 4, {1, 2, 3, 4, 5, 6, 7, 8, 9, 11, 12, 13, 14, 15, 16, 17, 18, 19, 20, 21, 22, 23, 24}, Es16][[3]],
{-0.015, 0.015}, {0, 1}]]}
PreC2[x_] := GeoRegionValuePlot[{Cambodia (country) -> ColorData["Rainbow"]][
Rescale[RefineEs[x, 2, 3, {1, 2, 3, 4, 5, 6, 7, 8, 9, 11, 12, 13, 14, 15, 16, 17, 18, 19, 20, 21, 22, 23, 24}, Es17][[3]],
{-0.015, 0.015}, {0, 1}], Laos (country) -> ColorData["Rainbow"]][
Rescale[RefineEs[x, 2, 3, {1, 2, 3, 4, 5, 6, 7, 8, 9, 11, 12, 13, 14, 15, 16, 17, 18, 19, 20, 21, 22, 23, 24}, Es18][[3]],

```

```

{-0.015, 0.015}, {0, 1}], Thailand (country) → ColorData["Rainbow"]
Rescale[RefineEs[x, 2, 3, {1, 2, 3, 4, 5, 6, 7, 8, 9, 11, 12, 13, 14, 15, 16, 17, 18, 19, 20, 21, 22, 23, 24}, Es19][[3]],
{-0.015, 0.015}, {0, 1}], Singapore (country) → ColorData["Rainbow"]
Rescale[RefineEs[x, 2, 3, {1, 2, 3, 4, 5, 6, 7, 8, 9, 11, 12, 13, 14, 15, 16, 17, 18, 19, 20, 21, 22, 23, 24}, Es20][[3]],
{-0.015, 0.015}, {0, 1}], Vietnam (country) → ColorData["Rainbow"]
Rescale[RefineEs[x, 2, 3, {1, 2, 3, 4, 5, 6, 7, 8, 9, 11, 12, 13, 14, 15, 16, 17, 18, 19, 20, 21, 22, 23, 24}, Es21][[3]],
{-0.015, 0.015}, {0, 1}], Malaysia (country) → ColorData["Rainbow"]
Rescale[RefineEs[x, 2, 3, {1, 2, 3, 4, 5, 6, 7, 8, 9, 11, 12, 13, 14, 15, 16, 17, 18, 19, 20, 21, 22, 23, 24}, Es22][[3]],
{-0.015, 0.015}, {0, 1}]]}
AHC1[x_] := GeoRegionValuePlot[{Slovenia (country) → ColorData["Rainbow"]Rescale[
RefineEs[x, 2, 4, {1, 2, 3, 4, 5, 6, 7, 8, 9, 11, 12, 13, 14, 15, 16, 17, 18, 19, 20, 21, 22, 23, 24}, Es1][[4]], {-10, 8}, {0, 1}],
Slovakia (country) → ColorData["Rainbow"]Rescale[RefineEs[x, 2, 4, {1, 2, 3, 4, 5, 6, 7, 8, 9, 11, 12, 13, 14, 15,
16, 17, 18, 19, 20, 21, 22, 23, 24}, Es2][[4]], {-10, 8}, {0, 1}], Poland (country) → ColorData["Rainbow"]
Rescale[RefineEs[x, 2, 4, {1, 2, 3, 4, 5, 6, 7, 8, 9, 11, 12, 13, 14, 15, 16, 17, 18, 19, 20, 21, 22, 23, 24}, Es3][[4]],
{-10, 8}, {0, 1}], Austria (country) → ColorData["Rainbow"]
Rescale[RefineEs[x, 2, 4, {1, 2, 3, 4, 5, 6, 7, 8, 9, 11, 12, 13, 14, 15, 16, 17, 18, 19, 20, 21, 22, 23, 24}, Es4][[4]],
{-10, 8}, {0, 1}], Belgium (country) → ColorData["Rainbow"]Rescale[
RefineEs[x, 2, 4, {1, 2, 3, 4, 5, 6, 7, 8, 9, 11, 12, 13, 14, 15, 16, 17, 18, 19, 20, 21, 22, 23, 24}, Es5][[4]], {-10, 8}, {0, 1}],
Bosnia and Herzegovina (country) → ColorData["Rainbow"]Rescale[
RefineEs[x, 2, 4, {1, 2, 3, 4, 5, 6, 7, 8, 9, 11, 12, 13, 14, 15, 16, 17, 18, 19, 20, 21, 22, 23, 24}, Es6][[4]], {-10, 8}, {0, 1}],
Germany (country) → ColorData["Rainbow"]Rescale[
RefineEs[x, 2, 4, {1, 2, 3, 4, 5, 6, 7, 8, 9, 11, 12, 13, 14, 15, 16, 17, 18, 19, 20, 21, 22, 23, 24}, Es7][[4]], {-10, 8}, {0, 1}],
France (country) → ColorData["Rainbow"]Rescale[
RefineEs[x, 2, 4, {1, 2, 3, 4, 5, 6, 7, 8, 9, 11, 12, 13, 14, 15, 16, 17, 18, 19, 20, 21, 22, 23, 24}, Es8][[4]], {-10, 8}, {0, 1}],
Netherlands (country) → ColorData["Rainbow"]Rescale[
RefineEs[x, 2, 4, {1, 2, 3, 4, 5, 6, 7, 8, 9, 11, 12, 13, 14, 15, 16, 17, 18, 19, 20, 21, 22, 23, 24}, Es9][[4]], {-10, 8}, {0, 1}],
Czech Republic (country) → ColorData["Rainbow"]Rescale[
RefineEs[x, 2, 4, {1, 2, 3, 4, 5, 6, 7, 8, 9, 11, 12, 13, 14, 15, 16, 17, 18, 19, 20, 21, 22, 23, 24}, Es10][[4]], {-10, 8}, {0, 1}],
Croatia (country) → ColorData["Rainbow"]Rescale[
RefineEs[x, 2, 4, {1, 2, 3, 4, 5, 6, 7, 8, 9, 11, 12, 13, 14, 15, 16, 17, 18, 19, 20, 21, 22, 23, 24}, Es11][[4]], {-10, 8}, {0, 1}],
Luxembourg (country) → ColorData["Rainbow"]Rescale[
RefineEs[x, 2, 4, {1, 2, 3, 4, 5, 6, 7, 8, 9, 11, 12, 13, 14, 15, 16, 17, 18, 19, 20, 21, 22, 23, 24}, Es12][[4]], {-10, 8}, {0, 1}],
Romania (country) → ColorData["Rainbow"]Rescale[RefineEs[x, 2, 4, {1, 2, 3, 4, 5, 6, 7, 8, 9, 11, 12, 13, 14, 15,
16, 17, 18, 19, 20, 21, 22, 23, 24}, Es13][[4]], {-10, 8}, {0, 1}], Hungary (country) → ColorData["Rainbow"]
Rescale[RefineEs[x, 2, 4, {1, 2, 3, 4, 5, 6, 7, 8, 9, 11, 12, 13, 14, 15, 16, 17, 18, 19, 20, 21, 22, 23, 24}, Es14][[4]],
{-10, 8}, {0, 1}], Italy (country) → ColorData["Rainbow"]Rescale[
RefineEs[x, 2, 4, {1, 2, 3, 4, 5, 6, 7, 8, 9, 11, 12, 13, 14, 15, 16, 17, 18, 19, 20, 21, 22, 23, 24}, Es15][[4]], {-10, 8}, {0, 1}],
United Kingdom (country) → ColorData["Rainbow"]Rescale[
RefineEs[x, 2, 4, {1, 2, 3, 4, 5, 6, 7, 8, 9, 11, 12, 13, 14, 15, 16, 17, 18, 19, 20, 21, 22, 23, 24}, Es16][[4]], {-10, 8}, {0, 1}]]}
AHC2[x_] := GeoRegionValuePlot[{Cambodia (country) → ColorData["Rainbow"]
Rescale[RefineEs[x, 2, 3, {1, 2, 3, 4, 5, 6, 7, 8, 9, 11, 12, 13, 14, 15, 16, 17, 18, 19, 20, 21, 22, 23, 24}, Es17][[4]],

```

```
{-10, 8}, {0, 1}], Laos (country) -> ColorData["Rainbow"][
Rescale[RefineEs[x, 2, 3, {1, 2, 3, 4, 5, 6, 7, 8, 9, 11, 12, 13, 14, 15, 16, 17, 18, 19, 20, 21, 22, 23, 24}, Es18][[4]],
{-10, 8}, {0, 1}], Thailand (country) -> ColorData["Rainbow"]][Rescale[
RefineEs[x, 2, 3, {1, 2, 3, 4, 5, 6, 7, 8, 9, 11, 12, 13, 14, 15, 16, 17, 18, 19, 20, 21, 22, 23, 24}, Es19][[4]], {-10, 8}, {0, 1}],
Singapore (country) -> ColorData["Rainbow"]][Rescale[
RefineEs[x, 2, 3, {1, 2, 3, 4, 5, 6, 7, 8, 9, 11, 12, 13, 14, 15, 16, 17, 18, 19, 20, 21, 22, 23, 24}, Es20][[4]], {-10, 8}, {0, 1}],
Vietnam (country) -> ColorData["Rainbow"]][Rescale[
RefineEs[x, 2, 3, {1, 2, 3, 4, 5, 6, 7, 8, 9, 11, 12, 13, 14, 15, 16, 17, 18, 19, 20, 21, 22, 23, 24}, Es21][[4]], {-10, 8}, {0, 1}],
Malaysia (country) -> ColorData["Rainbow"]][Rescale[
RefineEs[x, 2, 3, {1, 2, 3, 4, 5, 6, 7, 8, 9, 11, 12, 13, 14, 15, 16, 17, 18, 19, 20, 21, 22, 23, 24}, Es22][[4]], {-10, 8}, {0, 1}]]
```

We have defined six function above. “TemCoun1”, “PreC1” and “AHC1” are functions of temperature, precipitation and RH for European countries, the other three are functions for Southeast Asia countries

We use function “BarLegend” to get colorbar, we use function “TemCoun1” to draw the heat map of temperature in European countries

```
(*Colorbar for temperature*)
BarLegend[{"Rainbow", {-0.3, 0.3}}
```

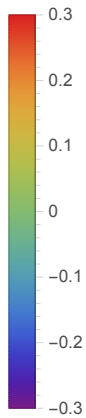

```
(*You can use function "Manipulate" to see the animation of the heat map!*)
Manipulate[TemCoun1[a], {a, 1, 24}]
```

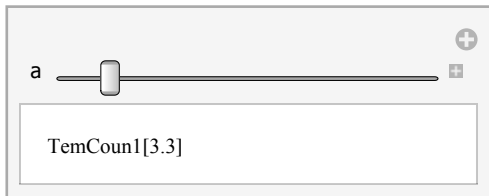

(\*For temperature in Jan-2012, Europe\*)

TemCoun1[1.0]

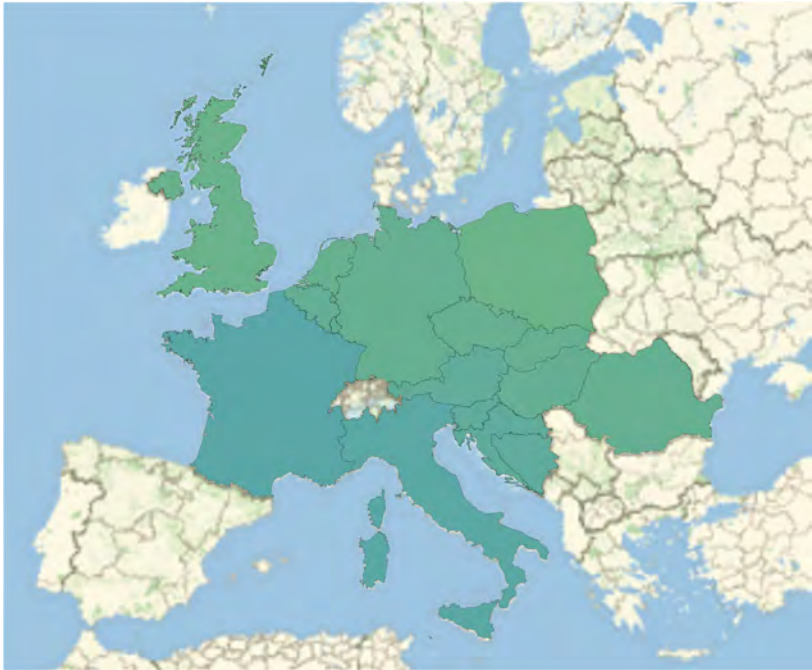

(\*For temperature in Jul-2012, Europe\*)

TemCoun1[7.0]

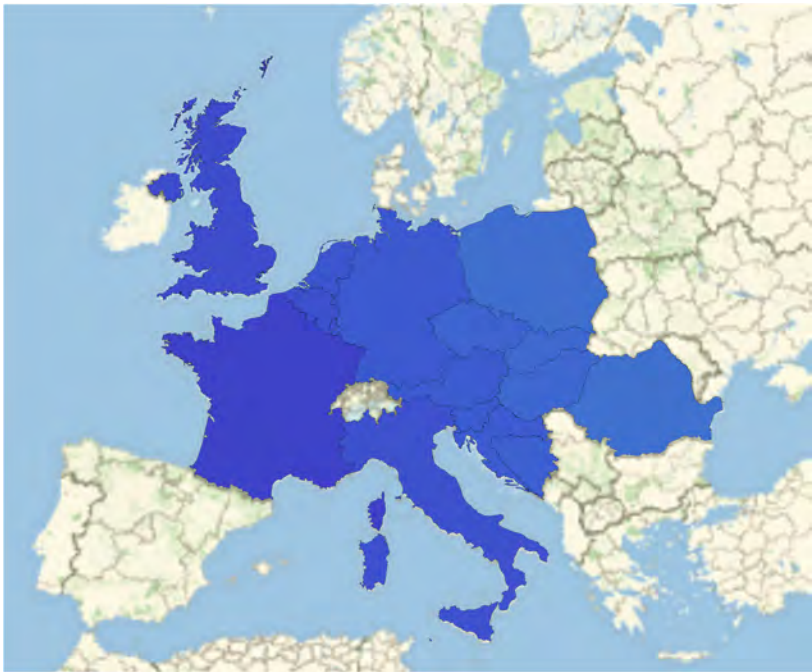



(\*For temperature in Jan-2013, Europe\*)

TemCoun1[13.0]

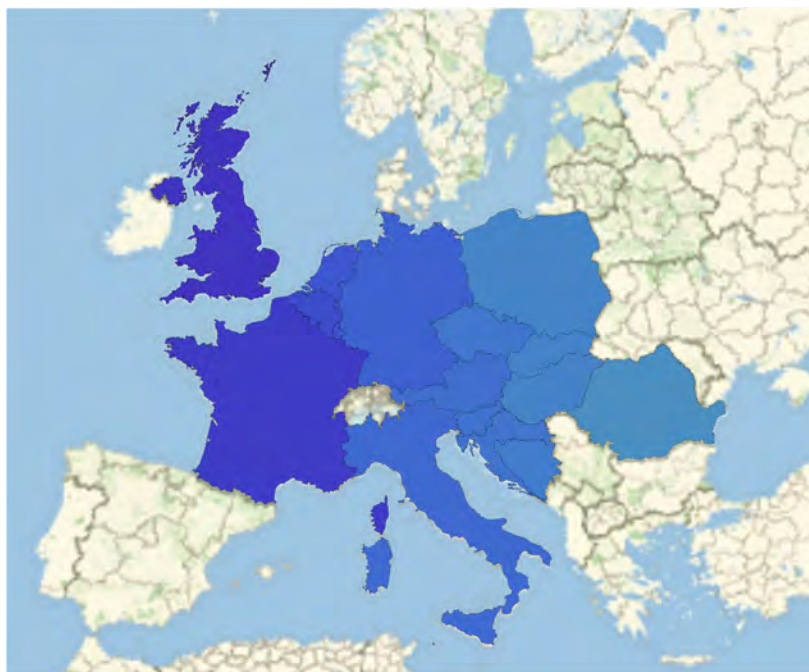

(\*For temperature in Jul-2013, Europe\*)

TemCoun1[19.0]

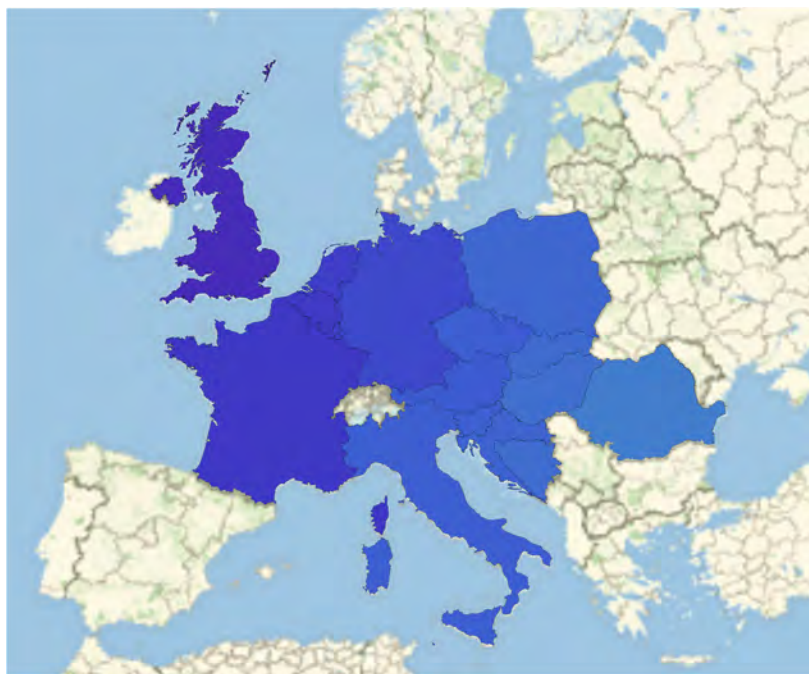

(\*Same process can be applied to heat map of other factor.\*)

(\*For temperature of Southeast asia\*)  
Manipulate[TemCoun2[a], {a, 1, 25}]

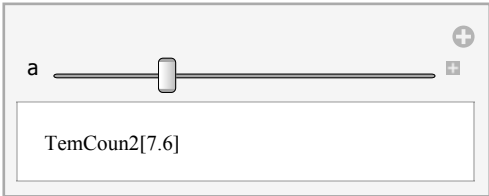

(\*colorbar for precipitation\*)  
BarLegend[{"Rainbow", {-0.015, 0.015}}]

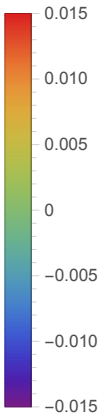

(\*For precipitation of European countries\*)  
Manipulate[PreC1[a], {a, 1, 25}]

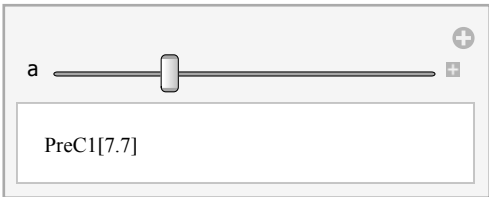

(\*For precipitation of Southeast asia\*)  
Manipulate[PreC2[a], {a, 1, 25}]

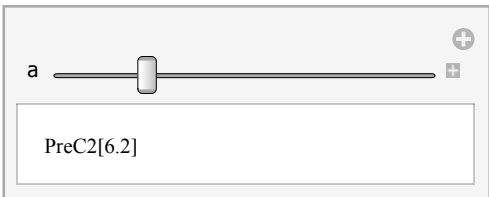



(\*colorbar for RH\*)

```
BarLegend[{"Rainbow", {-10, 8}}
```

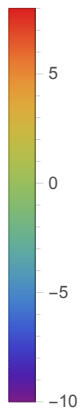

(\*For RH of European countries\*)

```
Manipulate[AHC1[a], {a, 1, 25}]
```

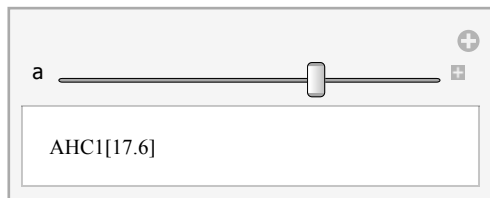

(\*For RH of Southeast asia\*)

```
Manipulate[AHC2[a], {a, 1, 25}]
```

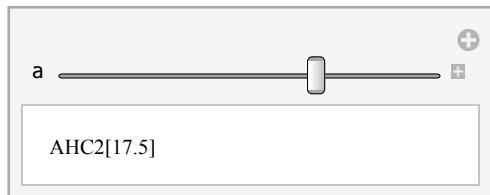

Supplement: 41598_2018_19772_MOESM2_ESM.pdf [file 41598_2018_19772_MOESM2_ESM.pdf]
