# Supplementary material for: Geographically weighted temporally correlated logistic regression model
Source: PubMed Central journal article supplement (PMC5780421; doi:10.1038/s41598-018-19772-6), 2018-01-23
Supplement: 41598_2018_19772_MOESM1_ESM.pdf [file 41598_2018_19772_MOESM1_ESM.pdf]

## **Supplementary Methods to**

### **Geographically weighted temporally correlated logistic regression model**

#### **Authors:**

Yang Liu<sup>1,2</sup>, Kwok-Fai Lam<sup>3</sup>, Joseph T Wu<sup>2</sup>, Tommy Tsan-Yuk Lam<sup>1,2\*</sup>

#### **Affiliations:**

<sup>1</sup> Center of Influenza Research, State Key Laboratory of Emerging Infectious Diseases, The University of Hong Kong

<sup>2</sup> School of Public Health, The University of Hong Kong

<sup>3</sup> Department of Statistics and Actuarial Science, The University of Hong Kong

\* Corresponding author

Email: [ttylam@hku.hk](mailto:ttylam@hku.hk)

Postal address: 5/F, Laboratory Block, Li Ka Shing Faculty of Medicine, The University of Hong Kong, 21 Sassoon Road, Pokfulam, Hong Kong SAR, China.

## Tetrachoric Correlation

The tetrachoric correlation approach, proposed by Lecessie and Vanhouwelingen<sup>1</sup>, is adopted to accommodate the potential association among the observations. The tetrachoric correlation will replace the original definition of correlation to describe the temporal correlation of the binary variables  $Y_{i,t,j}$  defined in the main text.

Suppose there is a random pair of binary variables  $Y = (Y_1, Y_2)$  of which  $Y$  is a realization of a bivariate continuous random variable  $Z = (Z_1, Z_2)$ , so that the correlation of  $Y_1$  and  $Y_2$  can be represented by that of  $Z$ . Suppose  $Z$  follows a standard bivariate normal distribution with correlation  $\rho$ , then we call  $\rho$  as the tetrachoric correlation of  $Y$ . To be more specific, let

$$\begin{aligned} P(Y_1 = 1) &= \pi_1, P(Y_2 = 1) = \pi_2, \\ g_1 &= \Phi^{-1}(\pi_1), g_2 = \Phi^{-1}(\pi_2), \end{aligned} \quad (1)$$

where  $\Phi$  is the cumulative distribution function of a standard normal distribution.

Suppose that

$$\begin{aligned} P(Y_1 = 1, Y_2 = 1) &= \pi_{11}; \\ P(Y_1 = 1, Y_2 = 0) &= \pi_{10}; \\ P(Y_1 = 0, Y_2 = 1) &= \pi_{01}; \\ P(Y_1 = 0, Y_2 = 0) &= \pi_{00}, \end{aligned} \quad (2)$$

and let  $\varphi_m(z, u, \Sigma)$  be the probability density function of bivariate normal distribution with dimension  $m$ , mean  $u$  and covariance matrix  $\Sigma$ . Then we have

$$\begin{aligned} \pi_{11} &= P(Z_1 < g_1, Z_2 < g_2) = \int_{-\infty}^{g_1} \int_{-\infty}^{g_2} \varphi_2 \left( (z_1, z_2), 0, \begin{pmatrix} 1 & \rho \\ \rho & 1 \end{pmatrix} \right) dz_1 dz_2; \\ \pi_{10} &= P(Z_1 < g_1, Z_2 > g_2) = \int_{-\infty}^{g_1} \int_{g_2}^{+\infty} \varphi_2 \left( (z_1, z_2), 0, \begin{pmatrix} 1 & \rho \\ \rho & 1 \end{pmatrix} \right) dz_1 dz_2; \\ \pi_{01} &= P(Z_1 > g_1, Z_2 < g_2) = \int_{g_1}^{+\infty} \int_{-\infty}^{g_2} \varphi_2 \left( (z_1, z_2), 0, \begin{pmatrix} 1 & \rho \\ \rho & 1 \end{pmatrix} \right) dz_1 dz_2; \\ \pi_{00} &= P(Z_1 > g_1, Z_2 > g_2) = \int_{g_1}^{+\infty} \int_{g_2}^{+\infty} \varphi_2 \left( (z_1, z_2), 0, \begin{pmatrix} 1 & \rho \\ \rho & 1 \end{pmatrix} \right) dz_1 dz_2. \end{aligned} \quad (3)$$

## Pseudo-Likelihood

In Section ‘‘Model Construction’’, the spatio-temporal local log-likelihood is rather complicated and difficult to differentiate. Here we use the pseudo-likelihood introduced in literature<sup>1</sup> to approximate the true likelihood.

Remember in the joint event  $Y_{i,t_k} = (Y_{i,t_k}, \dots, Y_{N_{i,t_k}})$  defined in the main text, we have  $N_{i,t_k}$

marginal events. We will now divide the joint event to a set of  $C_{N_{i,t_k}}^2$  pairwise events. Similar to Le

Cessie and van Houwelingen<sup>1</sup>, define  $l_{i,t_k,(p,q)}$  as the pairwise log likelihood for the pairwise event  $(Y_p, Y_q)$  with sampling time  $(t_p, t_q)$  and independent covariate vector  $(X_p, X_q)$ . Then, let the pseudo likelihood that simplifies  $l_{i,t_k}$  be

$$l_{i,t_k}^{pse} = \frac{1}{N_{i,t_k} - 1} \sum_{q=2}^{N_{i,t_k}} \sum_{p=1}^{q-1} l_{i,t_k,(p,q)}, \quad (4)$$

where

$$l_{i,t_k,(p,q)} = \sum_{a=0}^1 \sum_{b=0}^1 1_{\{Y_p=a, Y_q=b\}} \log(\pi_{ab,(pq)}), \quad (5)$$

such that

$$\begin{aligned} \pi_{11,(pq)} &= \int_{-\infty}^{g_p} \int_{-\infty}^{g_q} \varphi_2 \left( z_1, z_2, 0, \begin{pmatrix} 1 & c_i(|t_p - t_q|) \\ c_i(|t_p - t_q|) & 1 \end{pmatrix} \right) dz_1 dz_2; \\ \pi_{10,(pq)} &= \int_{-\infty}^{g_p} \int_{g_q}^{+\infty} \varphi_2 \left( z_1, z_2, 0, \begin{pmatrix} 1 & c_i(|t_p - t_q|) \\ c_i(|t_p - t_q|) & 1 \end{pmatrix} \right) dz_1 dz_2; \\ \pi_{01,(pq)} &= \int_{g_p}^{+\infty} \int_{-\infty}^{g_q} \varphi_2 \left( z_1, z_2, 0, \begin{pmatrix} 1 & c_i(|t_p - t_q|) \\ c_i(|t_p - t_q|) & 1 \end{pmatrix} \right) dz_1 dz_2; \\ \pi_{00,(pq)} &= \int_{g_p}^{+\infty} \int_{g_q}^{+\infty} \varphi_2 \left( z_1, z_2, 0, \begin{pmatrix} 1 & c_i(|t_p - t_q|) \\ c_i(|t_p - t_q|) & 1 \end{pmatrix} \right) dz_1 dz_2, \end{aligned} \quad (6)$$

with  $g_p = \Phi^{-1} \left( \frac{\exp(X_p \beta)}{1 + \exp(X_p \beta)} \right)$  and  $g_q = \Phi^{-1} \left( \frac{\exp(X_q \beta)}{1 + \exp(X_q \beta)} \right)$ . Then, the pseudo temporal local

log likelihood function for location  $i$  and time  $t_k$  is given by

$$\bar{l}_{i,t_k}^{pse} = \sum_{j=1}^M W_{ij} l_{j,t_k}^{pse}, \quad (7)$$

and the maximum pseudo local likelihood estimate for  $\beta(u_i, v_i, t_k)$  is given by

$$\hat{b}(u_i, v_i, t_k) = \operatorname{argmax}_{\beta} \bar{l}_{i,t_k}^{pse}. \quad (8)$$

In order to get the estimate, we need to differentiate  $\bar{l}_{i,t_k}^{pse}$  respect to  $\beta$ . This is equivalent to obtain the derivative of each  $l_{i,t_k,(p,q)}$ . We have

$$\frac{\partial l_{i,t_k,(p,q)}}{\partial \beta} = \sum_{a=0}^1 \sum_{b=0}^1 \frac{1_{\{Y_p=a, Y_q=b\}}}{\pi_{ab,(pq)}} \frac{\partial \pi_{ab,(pq)}}{\partial \beta}. \quad (9)$$

Taking expectation of the second order derivative, we have

$$E \left\{ \frac{\partial^2 l_{i,t_k,(p,q)}}{\partial \beta^2} \right\} = - \left\{ \sum_{a=0}^1 \sum_{b=0}^1 \frac{1}{\pi_{ab,(pq)}} \left( \frac{\partial \pi_{ab,(pq)}}{\partial \beta} \right) \left( \frac{\partial \pi_{ab,(pq)}}{\partial \beta} \right)' \right\}, \quad (10)$$

with

$$\begin{aligned}
\frac{\partial \pi_{11,(pq)}}{\partial \beta} &= \Phi \left( \frac{g_q - g_p c_i(|t_p - t_q|)}{\sqrt{1 - c_i(|t_p - t_q|)^2}} \right) \frac{\partial \left( \frac{\exp(X_p \beta)}{1 + \exp(X_p \beta)} \right)}{\partial \beta} + \Phi \left( \frac{g_p - g_q c_i(|t_p - t_q|)}{\sqrt{1 - c_i(|t_p - t_q|)^2}} \right) \frac{\partial \left( \frac{\exp(X_q \beta)}{1 + \exp(X_q \beta)} \right)}{\partial \beta}; \\
\frac{\partial \pi_{10,(pq)}}{\partial \beta} &= \Phi \left( \frac{-g_q + g_p c_i(|t_p - t_q|)}{\sqrt{1 - c_i(|t_p - t_q|)^2}} \right) \frac{\partial \left( \frac{\exp(X_p \beta)}{1 + \exp(X_p \beta)} \right)}{\partial \beta} - \Phi \left( \frac{g_p - g_q c_i(|t_p - t_q|)}{\sqrt{1 - c_i(|t_p - t_q|)^2}} \right) \frac{\partial \left( \frac{\exp(X_q \beta)}{1 + \exp(X_q \beta)} \right)}{\partial \beta}; \\
\frac{\partial \pi_{01,(pq)}}{\partial \beta} &= -\Phi \left( \frac{g_q - g_p c_i(|t_p - t_q|)}{\sqrt{1 - c_i(|t_p - t_q|)^2}} \right) \frac{\partial \left( \frac{\exp(X_p \beta)}{1 + \exp(X_p \beta)} \right)}{\partial \beta} + \Phi \left( \frac{-g_p + g_q c_i(|t_p - t_q|)}{\sqrt{1 - c_i(|t_p - t_q|)^2}} \right) \frac{\partial \left( \frac{\exp(X_q \beta)}{1 + \exp(X_q \beta)} \right)}{\partial \beta}; \\
\frac{\partial \pi_{00,(pq)}}{\partial \beta} &= -\Phi \left( \frac{-g_q + g_p c_i(|t_p - t_q|)}{\sqrt{1 - c_i(|t_p - t_q|)^2}} \right) \frac{\partial \left( \frac{\exp(X_p \beta)}{1 + \exp(X_p \beta)} \right)}{\partial \beta} - \Phi \left( \frac{-g_p + g_q c_i(|t_p - t_q|)}{\sqrt{1 - c_i(|t_p - t_q|)^2}} \right) \frac{\partial \left( \frac{\exp(X_q \beta)}{1 + \exp(X_q \beta)} \right)}{\partial \beta}.
\end{aligned}$$

We can attain the MLE using Fisher Scoring method based on the iteration function

$$\beta^{(k+1)} = \beta^{(k)} + \mathbf{I}(\beta^{(k)})^{-1} \left[ \frac{\partial \bar{l}_{i,t_k}^{pse}}{\partial \beta}(\beta^{(k)}) \right], \quad (11)$$

the iteration stops when the solution converges and we obtain the raw estimates  $\hat{b}(u_i, v_i, t_k)$ .

### Proof of Theorem 1

We write  $l_M(\beta)$  and  $\bar{l}_M(\beta)$  as following

$$l_M(\beta) = \bar{l}_{i,t_k}(\beta) = \sum_{j=1}^M W_{ij} \log(f_{j,t_k}(Y_{j,t_k} | \beta, X_{j,t_k})),$$

$$\bar{l}_M(\beta) = E_0(\bar{l}_{i,t_k}(\beta)) = \sum_{j=1}^M E_0(W_{ij} \log(f_{j,t_k}(Y_{j,t_k} | \beta, X_{j,t_k}))),$$

since  $\beta(u_i, v_i, t_k)$  is the true parameter,  $\forall \beta \in B$

$$\begin{aligned}
& \bar{l}_M(\beta) - \bar{l}_M(\beta(u_i, v_i, t_k)) \\
&= \sum_{j=1}^M W_{ij} E_0 \left( \log \left( f_{j,t_k}(Y_{j,t_k} | \beta, X_{j,t_k}) \right) - \log \left( f_{j,t_k}(Y_{j,t_k} | \beta(u_i, v_i, t_k), X_{j,t_k}) \right) \right) \\
&= \sum_{j=1}^M W_{ij} E_0 \left( \log \left( \frac{f_{j,t_k}(Y_{j,t_k} | \beta, X_{j,t_k})}{f_{j,t_k}(Y_{j,t_k} | \beta(u_i, v_i, t_k), X_{j,t_k})} \right) \right) \\
&= \sum_{j=1}^M W_{ij} \sum_{Y_{j,t_k}} \log \left( \frac{f_{j,t_k}(Y_{j,t_k} | \beta, X_{j,t_k})}{f_{j,t_k}(Y_{j,t_k} | \beta(u_i, v_i, t_k), X_{j,t_k})} \right) f_{j,t_k}(Y_{j,t_k} | \beta(u_j, v_j, t_k), X_{j,t_k}) \\
&\leq \sum_{j=1}^M W_{ij} \sum_{Y_{j,t_k}} \left( \frac{f_{j,t_k}(Y_{j,t_k} | \beta, X_{j,t_k})}{f_{j,t_k}(Y_{j,t_k} | \beta(u_i, v_i, t_k), X_{j,t_k})} - 1 \right) f_{j,t_k}(Y_{j,t_k} | \beta(u_j, v_j, t_k), X_{j,t_k}) \\
&= \sum_{j=1}^M W_{ij} \sum_{Y_{j,t_k}} \left( f_{j,t_k}(Y_{j,t_k} | \beta, X_{j,t_k}) \frac{f_{j,t_k}(Y_{j,t_k} | \beta(u_j, v_j, t_k), X_{j,t_k})}{f_{j,t_k}(Y_{j,t_k} | \beta(u_i, v_i, t_k), X_{j,t_k})} - f_{j,t_k}(Y_{j,t_k} | \beta(u_j, v_j, t_k), X_{j,t_k}) \right).
\end{aligned}$$

When the bandwidth of the geographical weight function is small enough, then for those  $\beta(u_j, v_j, t_k)$  which is significantly different to  $\beta(u_i, v_i, t_k)$  (e.g. when the geographical distance between location  $j$  and  $i$  is long enough) will have a weight function  $W_{ij}$  close to 0. Also, since  $\beta(u_i, v_i, t_k)$  is smooth related to  $u_i, v_i$ , for those neighbor locations where  $\beta(u_j, v_j, t_k)$  are not significantly different to  $\beta(u_i, v_i, t_k)$ , and in practice the trivial difference can be ignored. We simply set  $\beta(u_j, v_j, t_k) = \beta(u_i, v_i, t_k)$ , for those neighbor location under small bandwidth. Then we have

$$\begin{aligned}
& \frac{f_{j,t_k}(Y_{j,t_k} | \beta(u_j, v_j, t_k), X_{j,t_k})}{f_{j,t_k}(Y_{j,t_k} | \beta(u_i, v_i, t_k), X_{j,t_k})} = 1 \\
& \bar{l}_M(\beta) - \bar{l}_M(\beta(u_i, v_i, t_k)) \\
& \leq \sum_{j=1}^M W_{ij} 1_{\{W_{ij} > 0\}} \sum_{Y_{j,t_k}} \left( f_{j,t_k}(Y_{j,t_k} | \beta, X_{j,t_k}) - f_{j,t_k}(Y_{j,t_k} | \beta(u_j, v_j, t_k), X_{j,t_k}) \right) = 0.
\end{aligned}$$

So when bandwidth is sufficiently small, we have

$$\bar{l}_M(\beta(u_i, v_i, t_k)) \geq \bar{l}_M(\beta), \forall M > 0, \beta \in B.$$

Now consider for an open neighborhood

$$B_r(\beta(u_i, v_i, t_k)) = \{\beta | \beta - \beta(u_i, v_i, t_k) < r\} \subset B, \forall r,$$

under assumption 1 and by Kolmogorov strong law of large numbers, we have

$$P\left(\lim_{M \rightarrow +\infty} \frac{1}{M} (l_M(\beta) - \bar{l}_M(\beta)) = 0\right) = 1, \forall \beta \in B.$$

In other words, for any  $\beta \in B_r(\beta(u_i, v_i, t_k))$ , we have

$$\frac{1}{M} (l_M(\beta) - l_M(\beta(u_i, v_i, t_k))) \xrightarrow{a.s.} \lim_{M \rightarrow \infty} \frac{1}{M} (\bar{l}_M(\beta) - \bar{l}_M(\beta(u_i, v_i, t_k))) \leq 0,$$

because  $l_M(\beta)$  is continuous with respect to  $\beta$  in  $B_r(\beta(u_i, v_i, t_k))$ . Therefore when  $M$  is sufficiently large, it must have a local maximum point, denoted by  $\hat{\beta}(u_i, v_i, t_k)$ . Since  $l_M(\beta)$  is

differentiable, hence when  $M$  is sufficiently large, we must have

$$\frac{dl_M(\beta)}{d\beta} \Big|_{\beta=\hat{b}(u_i, v_i, t_k)} = 0.$$

Now because of arbitrary value of  $r$  and  $\|\hat{b}(u_i, v_i, t_k) - \beta(u_i, v_i, t_k)\| < r$ , we have

$$\hat{b}(u_i, v_i, t_k) \xrightarrow{P} \beta(u_i, v_i, t_k) \text{ when } M \rightarrow +\infty \quad \square$$

### Proof of Theorem 2

We explicitly write the vector form  $\beta = (\beta_1, \beta_2, \dots, \beta_p)^T$ , because  $\hat{b}(u_i, v_i, t_k)$  is the MLE of  $\bar{l}_{i,t_k}(\beta)$ , so by the mean value theorem, for every  $j \in \{1, 2, \dots, p\}$

$$0 = \frac{\partial \bar{l}_{i,t_k}(\beta)}{\partial \beta_j} \Big|_{\beta=\hat{b}(u_i, v_i, t_k)} = \frac{\partial \bar{l}_{i,t_k}(\beta)}{\partial \beta_j} \Big|_{\beta=\beta(u_i, v_i, t_k)} + \nabla \frac{\partial \bar{l}_{i,t_k}(\beta)}{\partial \beta_j} \Big|_{\beta=\beta^*} (\hat{b}(u_i, v_i, t_k) - \beta(u_i, v_i, t_k)).$$

Then write the above equation in vector form, we have

$$0 = \frac{\partial \bar{l}_{i,t_k}(\beta)}{\partial \beta} \Big|_{\beta=\hat{b}(u_i, v_i, t_k)} = \frac{\partial \bar{l}_{i,t_k}(\beta)}{\partial \beta} \Big|_{\beta=\beta(u_i, v_i, t_k)} + \frac{\partial^2 \bar{l}_{i,t_k}(\beta^*)}{\partial \beta^2} (\hat{b}(u_i, v_i, t_k) - \beta(u_i, v_i, t_k)),$$

where

$$\frac{\partial^2 \bar{l}_{i,t_k}(\beta^*)}{\partial \beta^2} = \begin{pmatrix} \frac{\partial^2 \bar{l}_{i,t_k}(\beta)}{\partial \beta_1^2} \Big|_{\beta=\beta_1^*} & \frac{\partial^2 \bar{l}_{i,t_k}(\beta)}{\partial \beta_1 \partial \beta_2} \Big|_{\beta=\beta_1^*} & \cdots & \frac{\partial^2 \bar{l}_{i,t_k}(\beta)}{\partial \beta_1 \partial \beta_p} \Big|_{\beta=\beta_1^*} \\ \frac{\partial^2 \bar{l}_{i,t_k}(\beta)}{\partial \beta_2 \partial \beta_1} \Big|_{\beta=\beta_2^*} & \frac{\partial^2 \bar{l}_{i,t_k}(\beta)}{\partial \beta_2^2} \Big|_{\beta=\beta_2^*} & \cdots & \frac{\partial^2 \bar{l}_{i,t_k}(\beta)}{\partial \beta_2 \partial \beta_p} \Big|_{\beta=\beta_2^*} \\ \vdots & \vdots & \ddots & \vdots \\ \frac{\partial^2 \bar{l}_{i,t_k}(\beta)}{\partial \beta_p \partial \beta_1} \Big|_{\beta=\beta_p^*} & \frac{\partial^2 \bar{l}_{i,t_k}(\beta)}{\partial \beta_p \partial \beta_2} \Big|_{\beta=\beta_p^*} & \cdots & \frac{\partial^2 \bar{l}_{i,t_k}(\beta)}{\partial \beta_p^2} \Big|_{\beta=\beta_p^*} \end{pmatrix},$$

and

$$\begin{cases} \beta_1^* = c_1 \hat{b}(u_i, v_i, t_k) + (1 - c_1) \beta(u_i, v_i, t_k), \\ \beta_2^* = c_2 \hat{b}(u_i, v_i, t_k) + (1 - c_2) \beta(u_i, v_i, t_k), \\ \vdots \\ \beta_p^* = c_p \hat{b}(u_i, v_i, t_k) + (1 - c_p) \beta(u_i, v_i, t_k), \end{cases} \quad 0 \leq c_1, \dots, c_p \leq 1.$$

So we have

$$\hat{b}(u_i, v_i, t_k) - \beta(u_i, v_i, t_k) = - \left( \frac{\partial^2 \bar{l}_{i,t_k}(\beta^*)}{\partial \beta^2} \right)^{-1} \left( \frac{\partial \bar{l}_{i,t_k}(\beta)}{\partial \beta} \Big|_{\beta=\beta(u_i, v_i, t_k)} \right).$$

Consider  $\frac{\partial \bar{l}_{i,t_k}(\beta)}{\partial \beta} \Big|_{\beta=\beta(u_i, v_i, t_k)}$ , under assumption 2 *ii, iii*, and by the multivariate Lindeberg-

Feller Central Limit Theorem<sup>2</sup>, we have

$$\sqrt{M} \left( \frac{1}{M} \frac{\partial \bar{l}_{i,t_k}(\beta)}{\partial \beta} \Big|_{\beta=\beta(u_i, v_i, t_k)} - \frac{1}{M} E_0 \left( \frac{\partial \bar{l}_{i,t_k}(\beta)}{\partial \beta} \Big|_{\beta=\beta(u_i, v_i, t_k)} \right) \right) \xrightarrow{d} N(0, \Sigma)$$

or equivalently,

$$\sqrt{M} \frac{1}{M} \frac{\partial \bar{l}_{i,t_k}(\beta)}{\partial \beta} \Big|_{\beta=\beta(u_i, v_i, t_k)} \sim AN \left( \frac{1}{\sqrt{M}} E_0 \left( \frac{\partial \bar{l}_{i,t_k}(\beta)}{\partial \beta} \Big|_{\beta=\beta(u_i, v_i, t_k)} \right), \overline{\Sigma}_M \right).$$

Now we have:

$$\begin{aligned} & E_0 \left( \frac{\partial \bar{l}_{i,t_k}(\beta)}{\partial \beta} \Big|_{\beta=\beta(u_i, v_i, t_k)} \right) \\ &= E_0 \left( \sum_{j=1}^M W_{ij} \frac{\frac{\partial f_{j,t_k}(Y_{j,t_k} | \beta, X_{j,t_k})}{\partial \beta} \Big|_{\beta=\beta(u_i, v_i, t_k)}}{f_{j,t_k}(Y_{j,t_k} | \beta(u_i, v_i, t_k), X_{j,t_k})} \right) \\ &= \sum_{j=1}^M W_{ij} \sum_{Y_{j,t_k}} \left( \left( \frac{\partial f_{j,t_k}(Y_{j,t_k} | \beta, X_{j,t_k})}{\partial \beta} \Big|_{\beta=\beta(u_i, v_i, t_k)} \right) \frac{f_{j,t_k}(Y_{j,t_k} | \beta(u_j, v_j, t_k), X_{j,t_k})}{f_{j,t_k}(Y_{j,t_k} | \beta(u_i, v_i, t_k), X_{j,t_k})} \right) \end{aligned}$$

As in the proof of Theorem 1, under the condition with large sample size and small bandwidth,  $W_{ij} = 0$  for a distant location  $j$ . While for a neighbor location  $j$ , by the smoothing property of  $\beta(u, v, t)$ , we have

$$\frac{f_{j,t_k}(Y_{j,t_k} | \beta(u_j, v_j, t_k))}{f_{j,t_k}(Y_{j,t_k} | \beta(u_i, v_i, t_k))} = 1,$$

then

$$\begin{aligned} E_0 \left( \frac{\partial \bar{l}_{i,t_k}(\beta)}{\partial \beta} \Big|_{\beta=\beta(u_i, v_i, t_k)} \right) &= \sum_{j=1}^M W_{ij} 1_{\{W_{ij}>0\}} \sum_{Y_{j,t_k}} \left( \frac{\partial f_{j,t_k}(Y_{j,t_k} | \beta, X_{j,t_k})}{\partial \beta} \Big|_{\beta=\beta(u_i, v_i, t_k)} \right), \\ &\because \sum_{Y_{j,t_k}} f_{j,t_k}(Y_{j,t_k} | \beta, X_{j,t_k}) = 1, \forall \beta \in B, \end{aligned}$$

therefore

$$E_0 \left( \frac{\partial \bar{l}_{i,t_k}(\beta)}{\partial \beta} \Big|_{\beta=\beta(u_i, v_i, t_k)} \right) = 0,$$

and hence

$$\sqrt{M} \frac{1}{M} \frac{\partial \bar{l}_{i,t_k}(\beta)}{\partial \beta} \Big|_{\beta=\beta(u_i, v_i, t_k)} \xrightarrow{d} N(0, \Sigma).$$

Now, consider  $\frac{\partial^2 \bar{l}_{i,t_k}(\beta^*)}{\partial \beta^2}$ , with assumption 2.iv and by Kolmogorov strong law of large numbers, we have

$$\frac{1}{M} \left( \frac{\partial^2 \bar{l}_{i,t_k}(\beta)}{\partial \beta^2} \Big|_{\beta=\beta(u_i, v_i, t_k)} \right)^P \rightarrow I.$$

By Theorem 1, we know that  $\hat{b}(u_i, v_i, t_k) \xrightarrow{P} \beta(u_i, v_i, t_k)$ , and because  $\beta_n^*$  lies between  $\hat{b}(u_i, v_i, t_k)$  and  $\beta(u_i, v_i, t_k)$  for  $1 \leq n \leq p$ , then we have

$$\frac{1}{M} \frac{\partial^2 \bar{l}_{i,t_k}(\beta^*)}{\partial \beta^2} \xrightarrow{P} I.$$

As we have already attained the asymptotic property of  $\frac{\partial \bar{l}_{i,t_k}(\beta)}{\partial \beta} \Big|_{\beta=\beta(u_i, v_i, t_k)}$  and  $\frac{\partial^2 \bar{l}_{i,t_k}(\beta^*)}{\partial \beta^2}$ ,

then by Slutsky's theorem, we have

$$\sqrt{M} \left( \hat{b}(u_i, v_i, t_k) - \beta(u_i, v_i, t_k) \right) \xrightarrow{d} N(0, I^{-1} \Sigma I^{-1}),$$

or equivalently, when sample size is large enough, we have

$$\sqrt{M} \left( \hat{b}(u_i, v_i, t_k) - \beta(u_i, v_i, t_k) \right) \sim AN(0, M I_M^{-1} \Sigma_M I_M^{-1}). \quad \square$$

## References:

- 1 Lecessie, S. & Vanhouwelingen, J. C. Logistic-Regression for Correlated Binary Data. *Appl Stat-J Roy St C* **43**, 95-108 (1994).
- 2 Greene, W. H. *Econometric analysis*. 5th edn, (Prentice Hall, 2003).
